# Supplementary material for: Sociodemographic differences in symptom severity and duration among women referred to secondary care for menorrhagia in England and Wales: a cohort study from the National Heavy Menstrual Bleeding Audit
Source: PubMed Central journal article supplement — BMJ Open. 2018 Feb 2;8(2):e018444. doi: 10.1136/bmjopen-2017-018444 (PMC5829848; doi:10.1136/bmjopen-2017-018444), 2018-02-02
Supplement: bmjopen-2017-018444.draft_revisions.pdf [file bmjopen-2017-018444.draft_revisions.pdf]

# BMJ Open

BMJ Open is committed to open peer review. As part of this commitment we make the peer review history of every article we publish publicly available.

When an article is published we post the peer reviewers' comments and the authors' responses online. We also post the versions of the paper that were used during peer review. These are the versions that the peer review comments apply to.

The versions of the paper that follow are the versions that were submitted during the peer review process. They are not the versions of record or the final published versions. They should not be cited or distributed as the published version of this manuscript.

BMJ Open is an open access journal and the full, final, typeset and author-corrected version of record of the manuscript is available on our site with no access controls, subscription charges or pay-per-view fees (<http://bmjopen.bmj.com>).

If you have any questions on BMJ Open's open peer review process please email [editorial.bmjopen@bmj.com](mailto:editorial.bmjopen@bmj.com)

# BMJ Open

## Sociodemographic differences in symptom severity and duration amongst women referred to secondary care for menorrhagia in England and Wales: a cohort study from the National Heavy Menstrual Bleeding Audit

|                                 |                                                                                                                                                                                                                                                                                                                                                                                                                                                                                                                                                                                                                                                                                                                                                                             |
|---------------------------------|-----------------------------------------------------------------------------------------------------------------------------------------------------------------------------------------------------------------------------------------------------------------------------------------------------------------------------------------------------------------------------------------------------------------------------------------------------------------------------------------------------------------------------------------------------------------------------------------------------------------------------------------------------------------------------------------------------------------------------------------------------------------------------|
| Journal:                        | <i>BMJ Open</i>                                                                                                                                                                                                                                                                                                                                                                                                                                                                                                                                                                                                                                                                                                                                                             |
| Manuscript ID                   | bmjopen-2017-018444                                                                                                                                                                                                                                                                                                                                                                                                                                                                                                                                                                                                                                                                                                                                                         |
| Article Type:                   | Research                                                                                                                                                                                                                                                                                                                                                                                                                                                                                                                                                                                                                                                                                                                                                                    |
| Date Submitted by the Author:   | 29-Jun-2017                                                                                                                                                                                                                                                                                                                                                                                                                                                                                                                                                                                                                                                                                                                                                                 |
| Complete List of Authors:       | Kiran, Amit; London School of Hygiene & Tropical Medicine, Department of Health Services Research and Policy<br>Geary, Rebecca; London School of Hygiene and Tropical Medicine Faculty of Public Health and Policy, Department of Health Services Research and Policy<br>Gurol Urganci, Ipek; London School of Hygiene & Tropical Medicine, Health Services Research & Policy<br>Cromwell, David; London School of Hygiene & Tropical Medicine, Health Services Research & Policy<br>Bansi-Matharu, Loveleen; University College London, Institute for Global Health<br>Shakespeare, Judy; Royal College of General Practitioners<br>Mahmood, Tahir; Forth Park Hospital, Obstetrics and Gynaecology<br>van der Meulen, Jan; London School of Hygiene and Tropical Medicine |
| <b>Primary Subject Heading</b>: | Obstetrics and gynaecology                                                                                                                                                                                                                                                                                                                                                                                                                                                                                                                                                                                                                                                                                                                                                  |
| Secondary Subject Heading:      | Health services research, Patient-centred medicine                                                                                                                                                                                                                                                                                                                                                                                                                                                                                                                                                                                                                                                                                                                          |
| Keywords:                       | GYNAECOLOGY, EPIDEMIOLOGY, PRIMARY CARE                                                                                                                                                                                                                                                                                                                                                                                                                                                                                                                                                                                                                                                                                                                                     |
|                                 |                                                                                                                                                                                                                                                                                                                                                                                                                                                                                                                                                                                                                                                                                                                                                                             |

SCHOLARONE™  
Manuscripts

1  
2  
3 1 Sociodemographic differences in symptom severity and duration amongst  
4 2 women referred to secondary care for menorrhagia in England and Wales: a  
5 3 cohort study from the National Heavy Menstrual Bleeding Audit  
6 4  
7 5

8 5  
9 6 Kiran A<sup>1,2,†</sup>, Geary RS<sup>1,2,†</sup>, Gurol-Urganci I<sup>1,2</sup>, Cromwell DA<sup>1,2</sup>, Bansi-Matharu L<sup>3</sup>, Shakespeare J<sup>4</sup>,  
10 7 Mahmood T<sup>2</sup>, van der Meulen J<sup>1,2</sup>  
11 8  
12 9

13 10 <sup>1</sup>*Department of Health Services Research and Policy, London School of Hygiene & Tropical Medicine,*  
14 11 *London, UK*

15 12 <sup>2</sup>*Lindsay Stewart Centre for Audit and Clinical Informatics, Royal College of Obstetricians and*  
16 13 *Gynaecologists, London, UK*

17 14 <sup>3</sup>*Institute of Epidemiology & Health, University College London, London, UK*

18 15 <sup>4</sup>*Royal College of General Practitioners, London, UK*  
19 16

20 17 † A Kiran and RS Geary contributed equally to this paper  
21 18

22 19 Corresponding author: Rebecca Geary, 15-17 Tavistock Place, London School of Hygiene & Tropical  
23 20 Medicine, London, WC1H 9SH. Email: [rebecca.geary@lshtm.ac.uk](mailto:rebecca.geary@lshtm.ac.uk) Telephone: 02079272279  
24 21

1  
2  
3 22 **ABSTRACT**

4 23 **Objective** To examine symptom severity and duration at time of referral to secondary care for heavy  
5  
6 24 menstrual bleeding by socio-economic deprivation, age and ethnicity

7 25 **Design** Cohort analysis of data from the National Heavy Menstrual Bleeding Audit linked to Hospital  
8  
9 26 Episode Statistics data

10 27 **Setting** English and Welsh National Health Services (secondary care): February 2011 to January 2012

11 28 **Participants** 15,325 women aged 18 to 60 years in England and Wales who had a new referral for  
12  
13 29 heavy menstrual bleeding to a gynaecology outpatient department

14 30 **Methods** Multivariable linear regression to calculate adjusted differences in mean symptom severity  
15  
16 31 and quality of life scores at first outpatient visit. Multivariable logistic regression to calculate  
17  
18 32 adjusted odds ratios. Adjustment for body mass index, parity and co-morbidities.

19 33 **Primary Outcome Measures** Mean symptom severity score (0=best, 100=worst), mean condition-  
20  
21 34 specific quality of life score (0=worst, 100=best) and symptom duration ( $\geq 1$  year).

22 35 **Results** Women were on average 42 years old and 12% were non-white. Mean symptom severity  
23  
24 36 and condition-specific quality of life scores were 61.8 and 34.7. Almost three-quarters of women  
25  
26 37 (74%) reported having had symptoms for  $\geq 1$  year. Women from more deprived areas had more  
27  
28 38 severe symptoms at their first outpatient visit (difference -6.1; 95%CI -7.2:-4.9, between least and  
29  
30 39 most deprived quintile) and worse condition-specific quality of life (difference 6.3; 95%CI 5.1:7.5).  
31  
32 40 Symptom severity declined with age whilst quality of life improved.

33 41 **Conclusions** Women living in more deprived areas reported more severe HMB symptoms and poorer  
34  
35 42 quality of life at the start of treatment in secondary care. Providers should examine referral practices  
36  
37 43 to explore if these differences reflect women's health-seeking behaviour or how providers decide  
38  
39 44 whether or not to refer.

40  
41 46 **Funding** The National Heavy Menstrual Bleeding (HMB) Audit was funded by the Healthcare Quality  
42  
43 47 Improvement Partnership as part of the National Clinical Audit and Patient Outcomes Programme,  
44  
45 48 contract number HQIP NCA 004.

46 49 **Keywords** heavy menstrual bleeding, deprivation, ethnicity, health inequalities, patient-reported  
47  
48 50 outcomes, quality of life

49 51 **Tweetable abstract** Women from deprived areas referred with more severe heavy menstrual  
50  
51 52 bleeding, potentially reflecting inequity

52  
53  
54  
55  
56  
57  
58  
59  
60

1  
2  
3 55 **Strengths and limitations of this study**

- 4 56 • This study is the first to examine Heavy Menstrual Bleeding symptom severity and duration  
5  
6 57 at time of referral to secondary care  
7  
8 58 • The inclusion of patient-reported symptom severity and quality of life addresses a  
9  
10 59 knowledge gap about how women feel about their heavy menstrual bleeding  
11  
12 60 • As the data were collected by a national audit in England and Wales the sample is relatively  
13  
14 61 large, allowing comparisons between ethnic minority groups  
15  
16 62 • Even though the sample size is large, the National HMB Audit recruited approximately 30%  
17  
18 63 of eligible women. However, the characteristics of the women recruited were broadly  
19  
20 64 representative of the UK population in terms of ethnicity and age  
21  
22 65 • Linking audit data to administrative hospital data also allowed comparisons between  
23  
24 66 socioeconomic groups  
25  
26  
27  
28  
29  
30  
31  
32  
33  
34  
35  
36  
37  
38  
39  
40  
41  
42  
43  
44  
45  
46  
47  
48  
49  
50  
51  
52  
53  
54  
55  
56  
57  
58  
59  
60 67

## 68 INTRODUCTION

69 Heavy menstrual bleeding (HMB) is a common condition that affects one in four women of  
70 reproductive age. In England and Wales, an estimated 50,000 women with HMB are referred to  
71 secondary care provided by the National Health Service (NHS) every year<sup>1</sup>. Menstrual disorders  
72 account for approximately 20% of referrals to specialist gynaecology services<sup>2</sup> and studies have  
73 found significant regional variations in use of surgical treatment within England<sup>3</sup>.

74  
75 Women with HMB have significantly worse quality of life than women with normal menstrual  
76 bleeding loss, in terms of their physical and mental health, as well as their emotional, social and  
77 material quality of life<sup>4-7</sup>. More than a third of women with HMB report severe pain<sup>7</sup>. HMB is also  
78 associated with morbidity, including anaemia and related fatigue<sup>8,9</sup>. Women with HMB experience  
79 reduced participation in social activities and their personal relationships and attendance at work can  
80 be adversely affected<sup>10</sup>.

81  
82 In order to improve the quality of life of women with HMB, it is important to understand both the  
83 aetiology of this condition and its management in primary and secondary care<sup>11</sup>. The prevalence of  
84 HMB and conditions which affect symptom severity has been reported to vary by ethnicity<sup>12-15</sup>. In  
85 addition, cultural norms and patient choice for treatment may vary between different groups<sup>16,17</sup>.

86  
87 In this study, we used data from the National HMB Audit to examine symptom severity, quality of  
88 life and symptom duration at women's first gynaecology outpatient visit for HMB. The National HMB  
89 Audit was a 4-year project (2010 - 2014) that assessed patient-reported outcomes and experiences  
90 of care for women with HMB in England and Wales. Our objective is to examine symptom severity  
91 and duration at the time of referral to secondary care by age, ethnicity and socio-economic  
92 deprivation to get a better understanding of the burden of disease at the start of treatment in  
93 secondary care.

94

1  
2  
3 95 **METHODS**

4 96 **Data collection**

5  
6 97 Full details of the methods used in the National HMB Audit have been reported elsewhere<sup>1, 4, 18, 19</sup>.

7 98 Women aged between 18 and 60 years in England and Wales who had a new referral for HMB to a  
8  
9 99 gynaecology outpatient department were eligible to participate in the National HMB Audit. Women  
10  
11 100 who had visited a gynaecology outpatient clinic for HMB within the previous 12 months were  
12  
13 101 excluded. Recruitment took place between 1 February 2011 and 31 January 2012<sup>1, 19</sup>.

14 102  
15 103 Women who consented to participate completed a baseline questionnaire (58 questions) on age,  
16 104 ethnicity, duration of HMB symptoms, obstetric history, prior treatment received for HMB and co-  
17 105 morbidities. The questionnaire also collected patient-reported HMB-specific and generic quality of  
18 106 life measures. Scores for symptom severity and condition-specific health-related quality of life were  
19 107 adapted from the Uterine Fibroid Symptom and Quality of Life (UFS-QoL) questionnaire<sup>20</sup>. A generic  
20 108 health-related quality of life measure was derived from the EuroQol-5 (EQ-5D)<sup>21</sup>. Women completed  
21 109 the questionnaire in hospital before their consultation. Using multiple sources of data, the  
22 110 recruitment rate of the audit was estimated to be 31.9%<sup>1</sup>. Descriptive results from the National HMB  
23 111 Audit have been published elsewhere<sup>1, 4, 18, 19</sup>.

24 112  
25 113 Data from the prospective audit were linked at patient level to records from Hospital Episode  
26 114 Statistics (HES) and Patient Episode Database for Wales (PEDW), administrative databases that  
27 115 capture all inpatient and outpatient episodes in English and Welsh NHS hospitals. Data linkage was  
28 116 performed using deterministic linkage criteria that included NHS number, sex and date of birth.

29 117  
30 118 **Measures**

31 119 Symptom severity, condition-specific quality of life and generic quality of life scores and the  
32 120 reported duration of symptoms at the first outpatient visit were used as outcomes in this study. The  
33 121 severity and quality of life scores were analysed as continuous variables. Symptom severity scores  
34 122 ranged from 0 (best possible score) to 100 (greatest symptom severity, worst possible score).  
35 123 Condition-specific quality of life ranged from 0 (poorest quality of life) to 100 (best quality of life).  
36 124 Generic quality of life is expressed on a scale with 0 representing death and 1 perfect health<sup>22</sup>.  
37 125 Women were asked "How long have you had symptoms of heavy menstrual bleeding", with "2  
38 126 months or less", "more than 2 months but less than 1 year", "more than 1 year" and "don't know" as  
39 127 possible response categories. For analysis, duration of symptoms was grouped as "<1 year", "≥1  
40 128 year" with "don't know" coded as missing. Levels of missing data on HMB symptoms and health-

1  
2  
3 129 related quality of life were low (2.2% for severity, 4.8% for condition-specific and 9.9% for generic  
4 130 quality of life and 3.0% for symptom duration).

5  
6 131

7 132 Age was categorised as 18-34, 35-39, 40-44, 45-49,  $\geq 50$  years for analysis. Women reported their  
8 133 ethnicity as “white”, “mixed”, “Asian or Asian British”, “black or black British”, “Chinese” or “other”.  
9 134 For analysis, the “mixed”, “Chinese” and “other” groups were combined as “other” due to small  
10 135 numbers of women reporting these ethnicities. Self-reported height and weight data were used to  
11 136 derive body mass index (BMI), categorised according to WHO groups as  $\leq 25$ , 25-30, and  $\geq 30$ <sup>23</sup>.

12 137 Women reported how many times they had seen their GP for HMB in the year prior to their first  
13 138 outpatient visit, and this was grouped as 0, 1-2, 3-4,  $>4$  for analysis (“don’t know” was coded as  
14 139 missing).

15  
16 140

17 141 Women reported their parity, grouped for analysis as “nulliparous” or “parous”. Women were also  
18 142 asked “Have you been told by a doctor that you have any of the following: “heart disease (for  
19 143 example angina, heart attack or heart failure), high blood pressure, lung disease (for example  
20 144 chronic bronchitis or emphysema), diabetes, depression, thyroid disorder, kidney disease, cancer  
21 145 (within the last 5 years). For analysis, the number of co-morbidities reported was grouped as 0, 1,  
22 146  $\geq 2$ .

23  
24 147

25 148 Information on socio-economic deprivation (Index of Multiple Deprivation (IMD)) was extracted  
26 149 from HES and PEDW. IMD is a relative measure of deprivation for small areas across a number of  
27 150 domains, including income, employment, education and housing. We used quintiles of IMD (level 1 =  
28 151 most deprived areas, level 5 = least deprived areas). The methods used to calculate IMD scores in  
29 152 each country in the UK are similar but not directly comparable<sup>24</sup>. For analysis, we generated a  
30 153 combined measure of deprivation for England and Wales by assigning those in each country-specific  
31 154 quintile to the same quintile in a combined measure. This preserved women’s relative deprivation  
32 155 position within each country.

33  
34 156

### 35 157 **Statistical analysis**

36 158 Means and standard deviations (SD) and proportions were used to describe the cohort. Regression  
37 159 analyses were used to examine the relationship between age, ethnicity and socio-economic  
38 160 deprivation and each of the outcomes. For the scores representing symptom severity, condition  
39 161 specific and generic quality of life, multivariable linear regression was used to calculate adjusted  
40 162 differences in mean scores. For duration of symptoms ( $<1$  year and  $\geq 1$  year), multivariable logistic  
41 163 regression was used to calculate adjusted odds ratios (OR). Regression models included BMI, parity



1  
2  
3 164 and number of co-morbidities as potential confounders. Levels of missing data were low (<3%) for  
4 165 the majority of variables with the exception of ethnicity (7% missing) and BMI (approximately 23%  
5 166 missing, Table 1). Missing values for explanatory variables were imputed using multiple imputation  
6 167 by chained equations<sup>25</sup> and statistical coefficients were obtained using ten imputed datasets and  
7 168 combined using Rubin's rules<sup>26</sup>.

10 169

## 12 170 **FUNDING**

14 171 The National Heavy Menstrual Bleeding (HMB) Audit was funded by the Healthcare Quality  
15 172 Improvement Partnership (HQIP) as part of the National Clinical Audit and Patient Outcomes  
16 173 Programme (NCAPOP). The audit was led by the Royal College of Obstetricians and Gynaecologists.  
17 174 The authors declare no funding for the writing of this manuscript.

20 175

## 22 176 **ETHICAL APPROVAL**

23 177 The data are from the National Heavy Menstrual Bleeding (HMB) Audit. Based on the Health  
24 178 Research Authority's guidance, audits are regulated as standard clinical practice outside of the  
25 179 Research Ethics Service<sup>27</sup>.

28 180

## 30 181 **RESULTS**

### 31 182 **Patient Characteristics**

32 183 15,325 eligible women completed the questionnaire at their first visit to a gynaecology outpatient  
33 184 department and 15,294 (99.8%) could be linked to HES or PEDW which provided information on  
34 185 socioeconomic deprivation. The women's mean age was 42.3 years (SD 7.6) and BMI 27.3 (SD 5.4)  
35 186 (Table 1). About one in five were nulliparous and one in three reported at least one co-morbidity.  
36 187 11.7% of women reported a non-white ethnicity, with black or black British (5.4%) and Asian or Asian  
37 188 British (4.3%) being the largest non-white groups. Women in the two least socioeconomically  
38 189 deprived national quintile groups (18.7% in quintile 4 and 15.8% in quintile 5) were under-  
39 190 represented given that per definition 20% of women are expected to be in each group. The  
40 191 distribution of symptom severity, condition-specific and generic quality of life and symptom duration  
41 192 by level of deprivation did not vary significantly between women in England and Wales (data not  
42 193 shown).

50 194

### 52 195 **Table 1: Patient characteristics at the first gynaecology outpatient visit for HMB**

53 196 **(% and number unless otherwise stated)**

55 197

1  
2  
3 198 The mean score for symptom severity was 61.8 (standard error (SE) 0.17) with 74.0% of women  
4 199 reporting that they had HMB symptoms for more than one year. The mean score for condition-  
5 200 specific quality of life was 34.7 (SE: 0.18) and for generic quality of life 0.65 (SE: 0.28) (Table 2).  
6  
7  
8

201

### 202 **Severity of symptoms and quality-of-life by socioeconomic deprivation**

203 Symptom severity scores gradually increased with increasing socioeconomic deprivation (Table 2).  
204 Condition-specific and generic quality of life scores also showed a worsening gradient according to  
205 deprivation. In other words, women living in more deprived areas reported more severe symptoms  
206 and a poorer quality of life at their first gynaecology outpatient visit for HMB than those living in less  
207 deprived areas.  
208

209

### 209 **Severity of symptoms and quality-of-life by age and ethnicity**

210 Symptom severity showed a gradual decrease with increasing age, indicating that older women  
211 reported less severe symptoms at their first outpatient visit for HMB (Table 2). Quality of life scores  
212 based on both the condition-specific and the generic measure increased with increasing age, which  
213 shows that older women reported better quality of life at their first HMB outpatient visit. Symptom  
214 severity also varied by ethnicity: black and Asian women reported less severe symptoms than white  
215 women (Table 2). Condition-specific quality of life did not vary significantly by ethnicity, whereas  
216 compared to white women, Asian woman reported lower generic quality of life scores (Table 2).  
217

218

### 218 **Duration of symptoms**

219 Women living in the most deprived areas were slightly less likely to report having had HMB  
220 symptoms for  $\geq 1$  year than those living in the less deprived areas. Women aged between 35 and 49  
221 years were more likely to report having experienced HMB symptoms for  $\geq 1$  year than those younger  
222 than 35. Compared to white women, black women were more likely than white women to report  
223 symptoms for  $\geq 1$  year and Asian women were less likely.  
224

225

### 225 **Table 2. Severity and duration of symptoms at the first outpatient visit, by age group, ethnicity** 226 **and socioeconomic deprivation**

227

228

229

230

231

232

233

234

235

236

1  
2  
3 227 **DISCUSSION**

4 228 **Main Findings**

5  
6 229 Women living in more socioeconomically deprived areas reported more severe HMB symptoms and  
7 230 poorer quality of life at their first gynaecology outpatient visit. Older women reported less severe  
8  
9 231 symptoms and better quality of life than younger women. Reported symptom severity also varied by  
10  
11 232 ethnicity with black and Asian women reporting less severe symptoms than women from white  
12  
13 233 ethnic backgrounds.

14 234

15 235 Three quarters of the women referred to secondary care reported that they had had symptoms of  
16  
17 236 HMB for at least one year and women living in the most deprived areas were least likely to report  
18  
19 237 having had HMB symptoms for  $\geq 1$  year.

20 238

21  
22 239 **Interpretation**

23 240 More severe symptoms and poorer quality of life at first outpatient visit by socioeconomic  
24  
25 241 deprivation, after adjustment for possible differences in age, ethnicity and body mass index, reflect  
26  
27 242 that women from more deprived backgrounds report more severe problems at the start of  
28  
29 243 treatment in secondary care but they were least likely to report that they had symptoms for  $\geq 1$  year.  
30  
31 244 There is evidence that people from more socioeconomically deprived backgrounds may be more  
32  
33 245 accepting of longstanding symptoms, chronic pain or poorer health-related quality of life<sup>28</sup>, which is  
34  
35 246 a possible explanation for these finding. Conversely, those from more affluent socioeconomic  
36  
37 247 backgrounds have been found to report greater impact of health conditions on their health and their  
38  
39 248 quality of life, which may be linked to their higher expectations about health and life in general<sup>29</sup>.

40 249

41 250 Alternative explanations are that differences in symptom severity, quality of life and symptom  
42  
43 251 reflect inequitable access as well as differences in the nature and causes of HMB. Age is often found  
44  
45 252 to be associated with symptom severity<sup>15, 16, 30, 31</sup>. Black women are 2-3 times more likely to have  
46  
47 253 fibroids and endometriosis<sup>31</sup>. Accepting heavy periods as normal vary by ethnicity and other social  
48  
49 254 factors, which in turn can also lead to reluctance to seek care for HMB<sup>16</sup>. Ethnographic research  
50  
51 255 suggests that some women of South Asian ethnicity do not seek healthcare for HMB due to the  
52  
53 256 belief that heavy periods cleanse the body<sup>17</sup>. We adjust for patient-level characteristics that may  
54  
55 257 capture some of these differences but were unable to adjust for other unmeasured potential  
56  
57 258 confounders.

58 259

1  
2  
3 260 The observation that women living in the most socio-economically deprived areas reported the most  
4 261 severe symptoms but were least likely to report having had symptoms for  $\geq 1$  year is more difficult to  
5  
6 262 explain. However, the question wording can have had an impact. Women were asked “How long  
7  
8 263 have you had symptoms of heavy menstrual bleeding?” and women whose symptom severity had  
9  
10 264 worsened may have reported the duration of the most recent severity, rather than the overall  
11  
12 265 duration.

13  
14 267 A key question is whether the observed differences in symptom severity and condition-specific  
15  
16 268 quality of life at the women’s first gynaecology outpatient visit are related to differences in women’s  
17  
18 269 health seeking behaviour or to differences in how GPs and gynaecologists decide on whether to  
19  
20 270 refer a woman with HMB. A study of self-reported health-care seeking behaviour in England did not  
21  
22 271 find evidence that inequality in access to secondary care according to socioeconomic or ethnic  
23  
24 272 backgrounds is related to patients being less likely to go to their GP or a hospital’s emergency  
25  
26 273 department<sup>33</sup>. Similarly, a survey of patients with chronic joint pain found that the proportions of  
27  
28 274 patients who said that they were seeking help from their GP did not differ according to their  
29  
30 275 socioeconomic background<sup>34</sup>. On the other hand, a national study including 130,000 patients from  
31  
32 276 more than 300 primary care practices in England found that older patients and those from more  
33  
34 277 deprived areas were less likely to be referred to secondary care<sup>35</sup>.

### 35 278

### 36 279 **Implications for policy and practice**

37 280 In the UK, national guidelines for the management of HMB have been developed by the National  
38  
39 281 Institute for Health and Care Excellence and the Royal College of Obstetricians and Gynaecologists  
40  
41 282 (RCOG)<sup>11, 36, 37</sup>. The National HMB Audit carried out a survey of NHS hospitals in England and Wales to  
42  
43 283 find out how care for women with HMB is organised and delivered at local levels. It found that key  
44  
45 284 systems such as the availability of local protocols, which specified local arrangements for patient  
46  
47 285 referral and management in response to the NICE guidelines, were reported only by 30% of  
48  
49 286 hospitals<sup>38</sup>. Wide variation in the investigations and treatments that were offered to women with  
50  
51 287 HMB in primary care were also noted. The implementation of locally agreed referral pathways,  
52  
53 288 recommended by the RCOG, will help to reduce this variation<sup>39</sup>.

54 289

55 290 Recent NICE guidelines recommend that interventions should focus on improving women’s quality of  
56  
57 291 life<sup>11</sup>, although criteria for what constitutes a meaningful improvement in quality of life are less  
58  
59 292 clear. In highlighting differences in symptom severity at their first gynaecology outpatient visit, our  
60  
293 findings draw attention to the lack of an agreed threshold for referral of women with HMB to

294 secondary care in terms of symptom severity and quality of life. Routine measurement of both  
295 symptom severity and quality of life may be required to stimulate greater consistency in referral  
296 thresholds but validated instruments specific to HMB are currently lacking. As there is no widely  
297 used condition-specific measure of condition-specific quality of life for HMB, the National HMB Audit  
298 used the Uterine Fibroid Symptom and Quality of Life (UFS-QOL) questionnaire, adapted for a UK  
299 population of women with HMB<sup>18</sup>.

300

### 301 **Strengths and Limitations**

302 This study is the first to examine the relationship between sociodemographic factors and patient-  
303 reported HMB symptom severity, quality of life and symptom duration in an outpatient setting. It  
304 used data collected by a national audit carried out in England and Wales, which produced a relatively  
305 large sample. We estimated that the National HMB Audit recruited about 30% of all eligible women.  
306 There is no direct way to compare the characteristics of the women who were recruited and those  
307 who were not. However, the characteristics of the women who were recruited were broadly  
308 representative of the UK population in terms of the distributions of ethnicity and age<sup>40, 41</sup>.

309

310 Survey questionnaires were only available in the English language, so non-English speakers are likely  
311 to be under-represented. On the other hand, case ascertainment varied by provider and women  
312 from providers with higher case ascertainment (ascertainment > 45%) were more often from a non-  
313 white ethnic background and a more deprived areas than those referred to providers with lower  
314 case ascertainment<sup>4</sup> which suggests that the impact of not having questionnaires in other languages  
315 is likely to be small.

316

### 317 **CONCLUSION**

318 About three in four women at their first visit to a gynaecological outpatient clinic for HMB in England  
319 and Wales reported that they had symptoms at least one year before they were referred to  
320 secondary care. Women from more deprived areas reported more severe HMB symptoms and a  
321 poorer quality of life, which demonstrates a higher burden of disease at the time of referral to  
322 secondary care. Primary and secondary care providers should examine to what extent these  
323 differences reflect barriers in access to gynaecological secondary care services or women's  
324 perceptions of their menstrual problems and health-seeking behaviour.

325

326

1  
2  
3 327 **ACKNOWLEDGEMENTS**

4 328 We would firstly like to thank all NHS providers and patients that participated in the National HMB  
5  
6 329 Audit. We would also like to thank Healthcare Quality Improvement Partnership, Health and Social  
7  
8 330 Care Information Centre and the Royal College of Surgeons of England for providing the authors with  
9  
10 331 the data required for this study. This publication is based on data collected by or on behalf of the  
11  
12 332 Healthcare Quality Improvement Partnership, who have no responsibility or liability for the accuracy,  
13  
14 333 currency, reliability and/or correctness of this publication.  
15

16 334  
17 335 **DATA SHARING STATEMENT**

18 336 The data analysed were collected as part of a national clinical audit and linked to administrative  
19  
20 337 hospital data (Hospital Episode Statistics). They were shared with the authors by the Healthcare  
21  
22 338 Quality Improvement Partnership, Health and Social Care Information Centre and the Royal College  
23  
24 339 of Surgeons of England. The data cannot be shared further without formal application to the data  
25  
26 340 providers.  
27

28 341  
29 342 **CONTRIBUTORS**

30 343 The research question was derived by TM and JvdM. Data collection was supported directly by AK,  
31  
32 344 IGU, DC, LBM and through advice by JS, TM, JvdM. Data analysis was performed by AK, IGU & RSG.  
33  
34 345 All authors contributed to the writing of the manuscript.  
35

36 346  
37 347 **COMPETING INTERESTS**

38 348 All authors have completed the ICMJE uniform disclosure form at [www.icmje.org/coi\\_disclosure.pdf](http://www.icmje.org/coi_disclosure.pdf)  
39  
40 349 and declare: all authors except RSG had financial support from the Healthcare Quality Improvement  
41  
42 350 Partnership as part of the National Clinical Audit and Patient Outcomes Programme for the  
43  
44 351 submitted work; no financial relationships with any organisations that might have an interest in the  
45  
46 352 submitted work in the previous three years; no other relationships or activities that could appear to  
47  
48 353 have influenced the submitted work.  
49

50 354  
51  
52  
53  
54  
55  
56  
57  
58  
59  
60

## 355 REFERENCES

- 356 1. Royal College of Obstetricians and Gynaecologists, London School of Hygiene & Tropical  
357 Medicine, Ipsos MORI, *National Heavy Menstrual Bleeding Audit: Third Annual Report*. 2013,  
358 RCOG Press.
- 359 2. Coulter, A., et al., *Outcomes of referrals to gynaecology outpatient clinics for menstrual  
360 problems: an audit of general practice records*. British Journal of Obstetrics and  
361 Gynaecology, 1991. **98**(8): p. 789-796.
- 362 3. Cromwell, D., et al., *Surgery for menorrhagia within English regions: variation in rates of  
363 endometrial ablation and hysterectomy*. BJOG, 2009. **116**(10): p. 1373-9.
- 364 4. Royal College of Obstetricians and Gynaecologists, London School of Hygiene & Tropical  
365 Medicine, Ipsos MORI, *National Heavy Menstrual Bleeding Audit: Final Report*. 2014, RCOG  
366 Press.
- 367 5. Karlsson, T.S., L.B. Marions, and M.G. Edlund, *Heavy menstrual bleeding significantly affects  
368 quality of life*. Acta Obstet Gynecol Scand., 2014. **93**(1): p. 52-7. doi: 10.1111/aogs.12292.  
369 Epub 2013 Nov 25.
- 370 6. Shankar, M., C. Chi, and R.A. Kadir, *Review of quality of life: menorrhagia in women with or  
371 without inherited bleeding disorders*. Haemophilia., 2008. **14**(1): p. 15-20. Epub 2007 Oct 24.
- 372 7. Sule Gokyildiz, E.A., Nezihe Kizilkaya Beji, Meltem Mecdi *The Effects of Menorrhagia on  
373 Women's Quality of Life: A Case-Control Study*. ISRN Obstet Gynecol., 2013. **918179**.
- 374 8. Wang, W., et al., *Iron deficiency and fatigue in adolescent females with heavy menstrual  
375 bleeding*. Haemophilia, 2013. **19**(2): p. 225-230.
- 376 9. Cohen, B. and Y. Gibor, *Anemia and menstrual blood loss*. Obstetric and Gynecological  
377 Survery, 1980. **35**(10): p. 597-618.
- 378 10. Bitzer, J., M. Serrani, and A. Lahav, *Women's attitudes towards heavy menstrual bleeding,  
379 and their impact on quality of life*. Journal of Contraception, 2013. **4**: p. 21–28. .
- 380 11. National Collaborating Centre for Women's and Children's Health, National Institute for  
381 Health and Clinical Excellence (NICE), *Heavy Menstrual Bleeding. Clinical Guideline No. 44*.  
382 2007, NICE.
- 383 12. Harlow, S.D. and B. Campbell, *Ethnic differences in the duration and amount of menstrual  
384 bleeding during the postmenarcheal period*. Am J Epidemiol., 1996. **144**(10): p. 980-8.
- 385 13. National Health Service (NHS) UK. *Heavy periods (menorrhagia) - Causes*. [cited  
386 20/02/2015]; Available from: [http://www.nhs.uk/Conditions/Periods-  
387 heavy/Pages/Causes.aspx](http://www.nhs.uk/Conditions/Periods-heavy/Pages/Causes.aspx).
- 388 14. Mayo Clinic. *Menorrhagia (heavy menstrual bleeding)*. [cited 20/02/2015]; Available from:  
389 <http://www.mayoclinic.org/diseases-conditions/menorrhagia/basics/causes/con-20021959>.
- 390 15. Barbara S. Apgar, A.H.K., Uche George-Nwogu, Anne Kittendorf, *Treatment of Menorrhagia*.  
391 2007: American Family Physician. p. 1813-1819.
- 392 16. O'Flynn, N., *Menstrual symptoms: the importance of social factors in women's experiences*.  
393 British Journal of General Practice, 2006. **56**(533): p. 950-957.
- 394 17. Chapple, A., *Iron deficiency anaemia in women of South Asian descent: a qualitative study*.  
395 Ethnicity and Health, 1998. **3**(3): p. 199-212.
- 396 18. Royal College of Obstetricians and Gynaecologists, London School of Hygiene & Tropical  
397 Medicine, Ipsos MORI, *National Heavy Menstrual Bleeding Audit: First Annual Report*. 2011,  
398 RCOG Press.
- 399 19. Royal College of Obstetricians and Gynaecologists, London School of Hygiene & Tropical  
400 Medicine, Ipsos MORI, *National Heavy Menstrual Bleeding Audit: Second Annual Report*.  
401 2012, RCOG Press.
- 402 20. Spies, J., et al., *The UFS-QOL, a New Disease-Specific Symptom and Health-Related Quality of  
403 Life Questionnaire for Leiomyomata*. Obstetrics and Gynecology, 2002. **99**(2): p. 290-300.
- 404 21. The EuroQol Group, *EuroQol-a new facility for the measurement of health-related quality of  
405 life*. Health Policy, 1990. **16**(3): p. 199-208.



- 1  
2  
3 406 22. Kind, P., G. Hardman, and S. Macran, *UK Population Norms for EQ-5D: York Centre for Health*  
4 407 *Economics Discussion Paper 172*. 1992.
- 5 408 23. World Health Organisation. *BMI Classification*. Global Database on Body Mass Index [cited  
6 409 06/10/2016]; Available from: [http://apps.who.int/bmi/index.jsp?introPage=intro\\_3.html](http://apps.who.int/bmi/index.jsp?introPage=intro_3.html).
- 7 410 24. Payne, R. and G. Abel, *UK indices of multiple deprivation - a way to make comparisons across*  
8 411 *constituent countries easier*. Health Statistics Quarterly, 2012. **53**.
- 9 412 25. Royston P, *Multiple imputation of missing values*. The Stata Journal, 2005 **5**: p. 527-36.
- 10 413 26. Rubin D, *Multiple imputation for non-response in surveys*. 1987, New York: John Wiley &  
11 414 Sons.
- 12 415 27. Health Research Authority, *Defining research*. 2016, Health Research Authority: London.
- 13 416 28. Delpierre, C., et al., *Using self-rated health for analysing social inequalities in health: a risk*  
14 417 *for underestimating the gap between socioeconomic groups?* Journal of Epidemiology and  
15 418 Community Health, 2009. **63**: p. 426-432.
- 16 419 29. Ross, C. and M. Van Willigen, *Education and the subjective quality of life*. Journal of Health  
17 420 and Social Behaviour, 1997. **38**: p. 275-297.
- 18 421 30. Janssen, C.A., P.C. Scholten, and A.P. Heintz, *Menorrhagia--a search for epidemiological risk*  
19 422 *markers*. Maturitas., 1997. **28**(1): p. 19-25.
- 20 423 31. National Institute for Health and Care Excellence (NICE), *NICE support for commissioning for*  
21 424 *heavy menstrual bleeding*. 2013.
- 22 425 32. Levesque, J.-F., M. Harris, and G. Russell, *Patient-centred access to health care:*  
23 426 *conceptualising access at the interface of health systems and populations*. International  
24 427 Journal for Equity in Health, 2013. **12**(18).
- 25 428 33. Adamson, J., et al., *Ethnicity, socioeconomic position and gender: do they affect reported*  
26 429 *health-care seeking behaviour*. Social Science and Medicine, 2003. **57**(5): p. 895-904.
- 27 430 34. Thorstensson, C., et al., *Help-seeking behaviour among people living with chronic hip or knee*  
28 431 *pain in the community*. BMC Musculoskeletal Disorders, 2009. **10**(153).
- 29 432 35. McBride, D., et al., *Explaining variation in referral from primary to secondary care: cohort*  
30 433 *study*. BMJ, 2010. **341**: p. c6267.
- 31 434 36. National Institute for Health and Care Excellence (NICE), *Heavy Menstrual Bleeding. NICE*  
32 435 *quality standard 47*. 2013, NICE.
- 33 436 37. Royal College of Obstetricians and Gynaecologists, *Standards for Gynaecology. Report of a*  
34 437 *Working Party*. 2008, RCOG.
- 35 438 38. Cox, S., et al., *The delivery of heavy menstrual bleeding services in England and Wales after*  
36 439 *publication of national guidelines: a survey of hospitals*. BMC Health Services Research,  
37 440 2013. **13**: p. 491.
- 38 441 39. Royal College of Obstetricians and Gynaecologists, *Advice for Heavy Menstrual Bleeding*  
39 442 *(HMB) Services and Commissioners*. 2014.
- 40 443 40. Office for National Statistics, *Office for National Statistics, 2001 Census: Social Focus in Brief -*  
41 444 *Ethnicity 2002*. 2002.
- 42 445 41. Office for National Statistics, *Office for National Statistics, 2011 Census: Ethnicity and*  
43 446 *National Identity in England and Wales 2011*. 2012.
- 44 447  
45 448  
46  
47  
48  
49  
50  
51  
52  
53  
54  
55  
56  
57  
58  
59  
60



449 **Table 1: Patient characteristics at the first gynaecology outpatient visit for HMB**  
 450 **(% and number unless otherwise stated)**

|                                                 | Full Cohort<br>(n=15,325) |
|-------------------------------------------------|---------------------------|
| Age, mean (sd) in years                         | 42.3 (7.6)                |
| Age groups                                      |                           |
| 18-34                                           | 14.9 (2,283)              |
| 35-39                                           | 12.9 (1,971)              |
| 40-44                                           | 26.6 (4,071)              |
| 45-49                                           | 31.3 (4,794)              |
| ≥50                                             | 14.4 (2,206)              |
| Body mass index, mean (sd) in kg/m <sup>2</sup> | 27.3 (5.4)                |
| Body mass index, categories                     |                           |
| ≤25                                             | 39.6 (4,681)              |
| 25-30                                           | 31.7 (3,739)              |
| ≥30                                             | 28.7 (3,392)              |
| Missing                                         | 3,513                     |
| Parity                                          |                           |
| Nulliparous                                     | 17.0 (2,530)              |
| Parous                                          | 83.0 (12,338)             |
| Missing                                         | 457                       |
| Number of reported comorbidities                |                           |
| 0                                               | 66.3 (10,165)             |
| 1                                               | 25.3 (3,878)              |
| ≥2                                              | 8.4 (1,282)               |
| Ethnicity                                       |                           |
| White                                           | 88.3 (12,614)             |
| Asian or Asian British                          | 4.3 (607)                 |
| Black or Black British                          | 5.4 (770)                 |
| Other                                           | 2.0 (292)                 |
| Missing                                         | 1,042                     |
| Socioeconomic deprivation (IMD)                 |                           |
| Quintile 1 (most deprived)                      | 23.5 (3,418)              |
| Quintile 2                                      | 21.7 (3,159)              |
| Quintile 3                                      | 20.2 (2,944)              |
| Quintile 4                                      | 18.7 (2,720)              |
| Quintile 5 (least deprived)                     | 15.8 (2,304)              |
| Missing                                         | 780                       |

451

**Table 2. Severity and duration of symptoms at the first outpatient visit, by age group, ethnicity and socioeconomic deprivation**

|                                    | Severity score<br>(0 best and 100 worst)<br>(n=14,990) |                                                 |         | Condition-specific quality of life<br>(0 worst and 100 best)<br>(n=14,586) |                                                 |         | Generic quality of life<br>(0 death and 1 perfect health)<br>(n=13,802) |                                             |         | Symptoms ≥1 year<br>(n=14,866) |                                         |          |
|------------------------------------|--------------------------------------------------------|-------------------------------------------------|---------|----------------------------------------------------------------------------|-------------------------------------------------|---------|-------------------------------------------------------------------------|---------------------------------------------|---------|--------------------------------|-----------------------------------------|----------|
|                                    | Mean score<br>(se)                                     | Adjusted <sup>i</sup><br>difference<br>(95% CI) | p-value | Mean score<br>(se)                                                         | Adjusted <sup>i</sup><br>difference<br>(95% CI) | p-value | Mean score<br>(se)                                                      | Adjusted <sup>i</sup><br>difference(95% CI) | p-value | % (se)                         | Adjusted <sup>i</sup><br>OR<br>(95% CI) | p-value  |
| 11 Total                           | 61.8 (0.17)                                            |                                                 |         | 34.7 (0.18)                                                                |                                                 |         | 0.65 (0.28)                                                             |                                             |         | 74.0 (0.36)                    |                                         |          |
| 12 Age group                       |                                                        |                                                 |         |                                                                            |                                                 |         |                                                                         |                                             |         |                                |                                         |          |
| 13 18-34                           | 63.1 (0.44)                                            | -                                               |         | 33.2 (0.48)                                                                | -                                               |         | 0.61 (0.007)                                                            | -                                           |         | 70.7 (0.98)                    | -                                       |          |
| 14 35-39                           | 62.9 (0.49)                                            | -1.59 (-2.89, -0.29)                            |         | 33.3 (0.51)                                                                | 1.75 (0.39, 3.10)                               |         | 0.63 (0.008)                                                            | 0.03 (0.01, 0.05)                           |         | 74.8 (1.00)                    | 1.25 (1.09, 1.44)                       |          |
| 15 40-44                           | 62.5 (0.33)                                            | -2.17 (-3.30, -1.04)                            | p<0.001 | 33.7 (0.35)                                                                | 2.59 (1.40, 3.77)                               | p<0.001 | 0.64 (0.005)                                                            | 0.04 (0.02, 0.06)                           | p<0.001 | 76.8 (0.67)                    | 1.39 (1.23, 1.58)                       | p<0.001  |
| 16 45-49                           | 61.3 (0.31)                                            | -3.36 (-4.47, -2.51)                            |         | 35.4 (0.33)                                                                | 4.23 (3.06, 5.39)                               |         | 0.67 (0.005)                                                            | 0.07 (0.05, 0.08)                           |         | 74.2 (0.64)                    | 1.20 (1.06, 1.35)                       |          |
| 17 ≥50                             | 59.0 (0.47)                                            | -5.88 (-7.19, -4.58)                            |         | 38.2 (0.51)                                                                | 7.31 (5.93, 8.68)                               |         | 0.70 (0.007)                                                            | 0.10 (0.07, 0.12)                           |         | 70.9 (0.98)                    | 1.01 (0.88, 1.16)                       |          |
| 18 Ethnicity                       |                                                        |                                                 |         |                                                                            |                                                 |         |                                                                         |                                             |         |                                |                                         |          |
| 19 White                           | 61.9 (0.19)                                            | -                                               |         | 34.8 (0.20)                                                                | -                                               |         | 0.66 (0.003)                                                            | -                                           |         | 74.1 (0.38)                    | -                                       |          |
| 20 Black or Black British          | 61.5 (0.82)                                            | -1.93 (-3.51, -0.35)                            |         | 35.0 (0.86)                                                                | 1.45 (-0.16, 3.06)                              |         | 0.62 (0.01)                                                             | -0.01 (-0.08, 0.02)                         |         | 79.4 (1.47)                    | 1.34 (1.11, 1.62)                       |          |
| 21 Asian or Asian British          | 60.7 (1.02)                                            | -2.38 (-4.25, -0.51)                            | P=0.011 | 34.2 (1.07)                                                                | 1.32 (-0.59, 3.22)                              | 0.1392  | 0.58 (0.02)                                                             | -0.05 (-0.88, -0.01)                        | p<0.001 | 66.1 (1.49)                    | 0.70 (0.58, 0.85)                       | p<0.001  |
| 22 Other                           | 61.5 (1.33)                                            | -0.46 (-3.09, 2.16)                             |         | 33.9 (1.41)                                                                | -1.01 (-3.54, 1.51)                             |         | 0.60 (0.02)                                                             | -0.05 (-0.30, -0.20)                        |         | 72.3 (2.67)                    | 0.92 (0.70, 1.20)                       |          |
| 23 Socioeconomic deprivation (IMD) |                                                        |                                                 |         |                                                                            |                                                 |         |                                                                         |                                             |         |                                |                                         |          |
| 24 Quintile 1 (most deprived)      | 65.5 (0.37)                                            | -                                               |         | 30.5 (0.39)                                                                | -                                               |         | 0.55 (0.007)                                                            | -                                           |         | 72.0 (0.78)                    | -                                       |          |
| 25 Quintile 2                      | 63.5 (0.38)                                            | -1.53 (-2.57, 0.50)                             |         | 33.1 (0.40)                                                                | 1.82 (0.75, 2.90)                               |         | 0.62 (0.006)                                                            | 0.06 (0.05, 0.08)                           |         | 73.6 (0.80)                    | 1.11 (0.99, 1.24)                       |          |
| 26 Quintile 3                      | 61.6 (0.39)                                            | -4.22 (-4.30, -2.12)                            | p<0.001 | 35.0 (0.41)                                                                | 3.44 (2.34, 4.54)                               | p<0.001 | 0.67 (0.006)                                                            | 0.09 (0.08, 0.11)                           | p<0.001 | 75.1 (0.81)                    | 1.20 (1.06, 1.34)                       | P=0.0091 |
| 27 Quintile 4                      | 59.5 (0.41)                                            | -6.02 (-6.02, -3.87)                            |         | 36.8 (0.43)                                                                | 4.78 (3.66, 5.90)                               |         | 0.71 (0.006)                                                            | 0.13 (0.12, 0.15)                           |         | 74.5 (0.85)                    | 1.16 (1.03, 1.31)                       |          |
| 28 Quintile 5 (least deprived)     | 58.2 (0.44)                                            | -6.07 (-7.23, -4.91)                            |         | 38.6 (0.46)                                                                | 6.29 (5.10, 7.48)                               |         | 0.73 (0.006)                                                            | 0.14 (0.13, 0.16)                           |         | 75.1 (0.91)                    | 1.21 (1.07, 1.37)                       |          |

Footnote: All multivariable models were adjusted for body mass index, parity, and number of co-morbidities. P-values based on Wald test

**STROBE 2007 (v4) Statement—Checklist of items that should be included in reports of cohort studies**

| Section/Topic             | Item # | Recommendation                                                                                                                                                                       | Reported on page # |
|---------------------------|--------|--------------------------------------------------------------------------------------------------------------------------------------------------------------------------------------|--------------------|
| Title and abstract        | 1      | (a) Indicate the study’s design with a commonly used term in the title or the abstract                                                                                               | 1                  |
|                           |        | (b) Provide in the abstract an informative and balanced summary of what was done and what was found                                                                                  | 2                  |
| <b>Introduction</b>       |        |                                                                                                                                                                                      |                    |
| Background/rationale      | 2      | Explain the scientific background and rationale for the investigation being reported                                                                                                 | 4                  |
| Objectives                | 3      | State specific objectives, including any prespecified hypotheses                                                                                                                     | 4                  |
| <b>Methods</b>            |        |                                                                                                                                                                                      |                    |
| Study design              | 4      | Present key elements of study design early in the paper                                                                                                                              | 5-6                |
| Setting                   | 5      | Describe the setting, locations, and relevant dates, including periods of recruitment, exposure, follow-up, and data collection                                                      | 5                  |
| Participants              | 6      | (a) Give the eligibility criteria, and the sources and methods of selection of participants. Describe methods of follow-up                                                           | 5                  |
|                           |        | (b) For matched studies, give matching criteria and number of exposed and unexposed                                                                                                  | N/A                |
| Variables                 | 7      | Clearly define all outcomes, exposures, predictors, potential confounders, and effect modifiers. Give diagnostic criteria, if applicable                                             | 5-6                |
| Data sources/ measurement | 8*     | For each variable of interest, give sources of data and details of methods of assessment (measurement). Describe comparability of assessment methods if there is more than one group | 5-6                |
| Bias                      | 9      | Describe any efforts to address potential sources of bias                                                                                                                            |                    |
| Study size                | 10     | Explain how the study size was arrived at                                                                                                                                            | 5, 7               |
| Quantitative variables    | 11     | Explain how quantitative variables were handled in the analyses. If applicable, describe which groupings were chosen and why                                                         | 5-6                |
| Statistical methods       | 12     | (a) Describe all statistical methods, including those used to control for confounding                                                                                                | 6-7                |
|                           |        | (b) Describe any methods used to examine subgroups and interactions                                                                                                                  | 6                  |
|                           |        | (c) Explain how missing data were addressed                                                                                                                                          | 7                  |
|                           |        | (d) If applicable, explain how loss to follow-up was addressed                                                                                                                       | N/A                |
|                           |        | (e) Describe any sensitivity analyses                                                                                                                                                | N/A                |
| <b>Results</b>            |        |                                                                                                                                                                                      |                    |

|                          |     |                                                                                                                                                                                                              |                        |
|--------------------------|-----|--------------------------------------------------------------------------------------------------------------------------------------------------------------------------------------------------------------|------------------------|
| Participants             | 13* | (a) Report numbers of individuals at each stage of study—eg numbers potentially eligible, examined for eligibility, confirmed eligible, included in the study, completing follow-up, and analysed            | 7                      |
|                          |     | (b) Give reasons for non-participation at each stage                                                                                                                                                         | Only one stage         |
|                          |     | (c) Consider use of a flow diagram                                                                                                                                                                           | Only one stage         |
| Descriptive data         | 14* | (a) Give characteristics of study participants (eg demographic, clinical, social) and information on exposures and potential confounders                                                                     | 7-8 and Table 1        |
|                          |     | (b) Indicate number of participants with missing data for each variable of interest                                                                                                                          | 8 (Table 1)            |
|                          |     | (c) Summarise follow-up time (eg, average and total amount)                                                                                                                                                  | N/A (Baseline)         |
| Outcome data             | 15* | Report numbers of outcome events or summary measures over time                                                                                                                                               | N/A (Baseline results) |
| Main results             | 16  | (a) Give unadjusted estimates and, if applicable, confounder-adjusted estimates and their precision (eg, 95% confidence interval). Make clear which confounders were adjusted for and why they were included | 8-9 (Table 2)          |
|                          |     | (b) Report category boundaries when continuous variables were categorized                                                                                                                                    | 8 (Table 2)            |
|                          |     | (c) If relevant, consider translating estimates of relative risk into absolute risk for a meaningful time period                                                                                             |                        |
| Other analyses           | 17  | Report other analyses done—eg analyses of subgroups and interactions, and sensitivity analyses                                                                                                               | N/A                    |
| <b>Discussion</b>        |     |                                                                                                                                                                                                              |                        |
| Key results              | 18  | Summarise key results with reference to study objectives                                                                                                                                                     | 9                      |
| <b>Limitations</b>       |     |                                                                                                                                                                                                              |                        |
| Interpretation           | 20  | Give a cautious overall interpretation of results considering objectives, limitations, multiplicity of analyses, results from similar studies, and other relevant evidence                                   | 9-10                   |
| Generalisability         | 21  | Discuss the generalisability (external validity) of the study results                                                                                                                                        | 11                     |
| <b>Other information</b> |     |                                                                                                                                                                                                              |                        |
| Funding                  | 22  | Give the source of funding and the role of the funders for the present study and, if applicable, for the original study on which the present article is based                                                | 7                      |

\*Give information separately for cases and controls in case-control studies and, if applicable, for exposed and unexposed groups in cohort and cross-sectional studies.

**Note:** An Explanation and Elaboration article discusses each checklist item and gives methodological background and published examples of transparent reporting. The STROBE checklist is best used in conjunction with this article (freely available on the Web sites of PLoS Medicine at <http://www.plosmedicine.org/>, Annals of Internal Medicine at <http://www.annals.org/>, and Epidemiology at <http://www.epidem.com/>). Information on the STROBE Initiative is available at [www.strobe-statement.org](http://www.strobe-statement.org).

# BMJ Open

## Sociodemographic differences in symptom severity and duration amongst women referred to secondary care for menorrhagia in England and Wales: a cohort study from the National Heavy Menstrual Bleeding Audit

|                                 |                                                                                                                                                                                                                                                                                                                                                                                                                                                                                                                                                                                                                                                                                                                                                                             |
|---------------------------------|-----------------------------------------------------------------------------------------------------------------------------------------------------------------------------------------------------------------------------------------------------------------------------------------------------------------------------------------------------------------------------------------------------------------------------------------------------------------------------------------------------------------------------------------------------------------------------------------------------------------------------------------------------------------------------------------------------------------------------------------------------------------------------|
| Journal:                        | <i>BMJ Open</i>                                                                                                                                                                                                                                                                                                                                                                                                                                                                                                                                                                                                                                                                                                                                                             |
| Manuscript ID                   | bmjopen-2017-018444.R1                                                                                                                                                                                                                                                                                                                                                                                                                                                                                                                                                                                                                                                                                                                                                      |
| Article Type:                   | Research                                                                                                                                                                                                                                                                                                                                                                                                                                                                                                                                                                                                                                                                                                                                                                    |
| Date Submitted by the Author:   | 06-Nov-2017                                                                                                                                                                                                                                                                                                                                                                                                                                                                                                                                                                                                                                                                                                                                                                 |
| Complete List of Authors:       | Kiran, Amit; London School of Hygiene & Tropical Medicine, Department of Health Services Research and Policy<br>Geary, Rebecca; London School of Hygiene and Tropical Medicine Faculty of Public Health and Policy, Department of Health Services Research and Policy<br>Gurol Urganci, Ipek; London School of Hygiene & Tropical Medicine, Health Services Research & Policy<br>Cromwell, David; London School of Hygiene & Tropical Medicine, Health Services Research & Policy<br>Bansi-Matharu, Loveleen; University College London, Institute for Global Health<br>Shakespeare, Judy; Royal College of General Practitioners<br>Mahmood, Tahir; Forth Park Hospital, Obstetrics and Gynaecology<br>van der Meulen, Jan; London School of Hygiene and Tropical Medicine |
| <b>Primary Subject Heading</b>: | Obstetrics and gynaecology                                                                                                                                                                                                                                                                                                                                                                                                                                                                                                                                                                                                                                                                                                                                                  |
| Secondary Subject Heading:      | Health services research, Patient-centred medicine                                                                                                                                                                                                                                                                                                                                                                                                                                                                                                                                                                                                                                                                                                                          |
| Keywords:                       | GYNAECOLOGY, EPIDEMIOLOGY, PRIMARY CARE                                                                                                                                                                                                                                                                                                                                                                                                                                                                                                                                                                                                                                                                                                                                     |
|                                 |                                                                                                                                                                                                                                                                                                                                                                                                                                                                                                                                                                                                                                                                                                                                                                             |

SCHOLARONE™  
Manuscripts

1  
2  
3 1 Sociodemographic differences in symptom severity and duration amongst  
4 2 women referred to secondary care for menorrhagia in England and Wales: a  
5 3 cohort study from the National Heavy Menstrual Bleeding Audit  
6 4  
7 5

8 5  
9 6 Kiran A<sup>1,2,†</sup>, Geary RS<sup>1,2,†</sup>, Gurol-Urganci I<sup>1,2</sup>, Cromwell DA<sup>1,2</sup>, Bansi-Matharu L<sup>3</sup>, Shakespeare J<sup>4</sup>,  
10 7 Mahmood T<sup>2</sup>, van der Meulen J<sup>1,2</sup>  
11 8  
12 9

13 10 <sup>1</sup>*Department of Health Services Research and Policy, London School of Hygiene & Tropical Medicine,*  
14 11 *London, UK*

15 12 <sup>2</sup>*Lindsay Stewart Centre for Audit and Clinical Informatics, Royal College of Obstetricians and*  
16 13 *Gynaecologists, London, UK*

17 14 <sup>3</sup>*Institute of Epidemiology & Health, University College London, London, UK*

18 15 <sup>4</sup>*Royal College of General Practitioners, London, UK*  
19 16

20 17 † A Kiran and RS Geary contributed equally to this paper  
21 18

22 19 Corresponding author: Rebecca Geary, 15-17 Tavistock Place, London School of Hygiene & Tropical  
23 20 Medicine, London, WC1H 9SH. Email: [rebecca.geary@lshtm.ac.uk](mailto:rebecca.geary@lshtm.ac.uk) Telephone: 02079272279  
24 21

1  
2  
3 22 **ABSTRACT**

4 23 **Objective** To examine symptom severity and duration at time of referral to secondary care for heavy  
5  
6 24 menstrual bleeding by socio-economic deprivation, age and ethnicity

7 25 **Design** Cohort analysis of data from the National Heavy Menstrual Bleeding Audit linked to Hospital  
8  
9 26 Episode Statistics data

10 27 **Setting** English and Welsh National Health Services (secondary care): February 2011 to January 2012

11 28 **Participants** 15,325 women aged 18 to 60 years in England and Wales who had a new referral for  
12  
13 29 heavy menstrual bleeding to a gynaecology outpatient department

14 30 **Methods** Multivariable linear regression to calculate adjusted differences in mean symptom severity  
15  
16 31 and quality of life scores at first outpatient visit. Multivariable logistic regression to calculate  
17  
18 32 adjusted odds ratios. Adjustment for body mass index, parity and co-morbidities.

19 33 **Primary Outcome Measures** Mean symptom severity score (0=best, 100=worst), mean condition-  
20  
21 34 specific quality of life score (0=worst, 100=best) and symptom duration ( $\geq 1$  year).

22 35 **Results** Women were on average 42 years old and 12% were non-white. Mean symptom severity  
23  
24 36 and condition-specific quality of life scores were 61.8 and 34.7. Almost three-quarters of women  
25  
26 37 (74%) reported having had symptoms for  $\geq 1$  year. Women from more deprived areas had more  
27  
28 38 severe symptoms at their first outpatient visit (difference -6.1; 95%CI -7.2:-4.9, between least and  
29  
30 39 most deprived quintile) and worse condition-specific quality of life (difference 6.3; 95%CI 5.1:7.5).  
31  
32 40 Symptom severity declined with age whilst quality of life improved.

33 41 **Conclusions** Women living in more deprived areas reported more severe HMB symptoms and poorer  
34  
35 42 quality of life at the start of treatment in secondary care. Providers should examine referral practices  
36  
37 43 to explore if these differences reflect women's health-seeking behaviour or how providers decide  
38  
39 44 whether or not to refer.

40  
41 46 **Funding** The National Heavy Menstrual Bleeding (HMB) Audit was funded by the Healthcare Quality  
42  
43 47 Improvement Partnership as part of the National Clinical Audit and Patient Outcomes Programme,  
44  
45 48 contract number HQIP NCA 004.

46 49 **Keywords** heavy menstrual bleeding, deprivation, ethnicity, health inequalities, patient-reported  
47  
48 50 outcomes, quality of life

49 51 **Tweetable abstract** Women from deprived areas referred with more severe heavy menstrual  
50  
51 52 bleeding, potentially reflecting inequity

52  
53  
54 53  
55  
56  
57  
58  
59  
60 54

1  
2  
3 55 **Strengths and limitations of this study**

- 4 56 • This study is the first to examine Heavy Menstrual Bleeding symptom severity and duration  
5  
6 57 at time of referral to secondary care  
7  
8 58 • The inclusion of patient-reported symptom severity and quality of life addresses a  
9  
10 59 knowledge gap about how women feel about their heavy menstrual bleeding  
11  
12 60 • As the data were collected by a national audit in England and Wales the sample is relatively  
13  
14 61 large, allowing comparisons between ethnic minority groups  
15  
16 62 • Even though the sample size is large, the National HMB Audit recruited approximately 30%  
17  
18 63 of eligible women. However, the characteristics of the women recruited were broadly  
19  
20 64 representative of the UK population in terms of ethnicity and age  
21  
22 65 • Linking audit data to administrative hospital data also allowed comparisons between  
23  
24 66 socioeconomic groups  
25  
26  
27  
28  
29  
30  
31  
32  
33  
34  
35  
36  
37  
38  
39  
40  
41  
42  
43  
44  
45  
46  
47  
48  
49  
50  
51  
52  
53  
54  
55  
56  
57  
58  
59  
60 67



## 68 INTRODUCTION

69 Heavy menstrual bleeding (HMB) is a common condition that affects one in four women of  
70 reproductive age. In England and Wales, an estimated 50,000 women with HMB are referred from  
71 primary care to secondary care gynaecology services provided by the National Health Service (NHS)  
72 every year[1]. Menstrual disorders account for approximately 20% of referrals to specialist  
73 gynaecology services[2] and studies have found significant regional variations in use of surgical  
74 treatment within England[3].

75  
76 Women with HMB have significantly worse quality of life than women with normal menstrual  
77 bleeding loss, in terms of their physical and mental health, as well as their emotional, social and  
78 material quality of life[4-7]. More than a third of women with HMB report severe pain[7]. HMB is  
79 also associated with morbidity, including anaemia and related fatigue[8, 9]. Women with HMB  
80 experience reduced participation in social activities and their personal relationships and attendance  
81 at work can be adversely affected[10].

82  
83 In order to improve the quality of life of women with HMB, it is important to understand both the  
84 aetiology of this condition and its management in primary and secondary care[11]. The prevalence  
85 of HMB and conditions which affect symptom severity has been reported to vary by ethnicity[12-15].  
86 In addition, cultural norms and patient choice for treatment may vary between different groups[16,  
87 17].

88  
89 In this study, we used data from the National HMB Audit to examine symptom severity, quality of  
90 life and symptom duration at women's first gynaecology outpatient visit for HMB. The National HMB  
91 Audit was a 4-year project (2010 - 2014) that assessed patient-reported outcomes and experiences  
92 of care for women with HMB in England and Wales. Our objective is to examine symptom severity  
93 and duration at the time of referral to secondary care by age, ethnicity and socio-economic  
94 deprivation to get a better understanding of the burden of disease at the start of treatment in  
95 secondary care.

96

1  
2  
3 97 **METHODS**

4 98 **Data collection**

5  
6 99 Full details of the methods used in the National HMB Audit have been reported elsewhere[1, 4, 18,  
7 100 19]. Women aged between 18 and 60 years in England and Wales who had a new referral for HMB  
8 101 to a gynaecology outpatient department were eligible to participate in the National HMB Audit.  
9 102 Women who had visited a gynaecology outpatient clinic for HMB within the previous 12 months  
10 103 were excluded. Recruitment took place between 1 February 2011 and 31 January 2012[1, 19].  
11  
12  
13

14 104  
15 105 Women who consented to participate completed a baseline questionnaire (58 questions) on age,  
16 106 ethnicity, duration of HMB symptoms, obstetric history, prior treatment received for HMB and co-  
17 107 morbidities. The questionnaire also collected patient-reported HMB-specific and generic quality of  
18 108 life measures.  
19

20 109  
21  
22  
23 110 Scores for symptom severity and condition-specific health-related quality of life were adapted from  
24 111 the Uterine Fibroid Symptom and Quality of Life (UFS-QoL) questionnaire[20]. Of five candidate  
25 112 questionnaires evaluated, only the UFS-QOL could be used throughout the care pathway, measured  
26 113 HRQoL and was psychometrically strong[18]. The UFS-QOL was therefore adapted for HMB and a UK  
27 114 population. We conducted semi-structured interviews with women ( $n = 7$ ) and clinicians ( $n = 5$ ) and  
28 115 a mini focus group ( $n = 3$ ) with local Heavy Menstrual Bleeding Audit coordinators to determine  
29 116 suitable alternative words to describe HMB, and to identify words not clearly understood in UK  
30 117 English. Based on this we changed the wording to refer to 'heavy menstrual bleeding' (i.e. heavy  
31 118 periods) rather than 'fibroids', changed 'checking' to 'ticking'; 'soiling' to 'staining'; 'blue' to 'low';  
32 119 and 'wiped out' to 'exhausted'. The adapted version performed acceptably in a psychometric  
33 120 evaluation. Overall, the symptom severity subscale and the HRQL subscale of the UFS-QOL used as  
34 121 outcomes demonstrated the strongest psychometric properties and have been used to report the  
35 122 audit data. The UFS-QOL consists of eight symptom items and 29 HRQoL items. The symptom items  
36 123 are scored to produce a severity subscale and the HRQoL items are scored into subscales (concern,  
37 124 activities, energy/mood, control, self-consciousness and sexual function). The HRQoL sub-scales can  
38 125 be used separately or combined into an overall HRQoL score. We use the overall HRQoL score in this  
39 126 paper.  
40  
41  
42  
43  
44  
45  
46  
47  
48  
49

50 127  
51 128  
52  
53 129 A generic health-related quality of life measure was derived from the European Quality of Life-5  
54 130 Dimensions (EuroQol-5 or EQ-5D)[21]. This generic measure was used because it is the instrument  
55  
56  
57

1  
2  
3 131 recommended by the Department of Health and allows comparisons with other national studies,  
4 132 such as the Patient Reported Outcome Measures study of common elective surgical procedures[21].  
5  
6 133 Women completed the questionnaire in hospital before their consultation. Using multiple sources of  
7  
8 134 data, the recruitment rate of the audit was estimated to be 31.9%[1]. Descriptive results from the  
9  
10 135 National HMB Audit have been published elsewhere[1, 4, 18, 19].  
11

12 136  
13 137 Data from the prospective audit were linked at patient level to records from Hospital Episode  
14 138 Statistics (HES) and Patient Episode Database for Wales (PEDW), administrative databases that  
15 139 capture all inpatient and outpatient episodes in English and Welsh NHS hospitals. Data linkage was  
16 140 performed using deterministic linkage criteria that included NHS number, sex and date of birth.  
17  
18 141

## 142 **Measures**

143 Symptom severity, condition-specific quality of life and generic quality of life scores and the  
144 reported duration of symptoms at the first outpatient visit were used as outcomes in this study. The  
145 severity and quality of life scores were analysed as continuous variables. Symptom severity scores  
146 ranged from 0 (best possible score) to 100 (greatest symptom severity, worst possible score).  
147 Condition-specific quality of life ranged from 0 (poorest quality of life) to 100 (best quality of life).  
148 Generic quality of life is expressed on a scale with 0 representing death and 1 perfect health[22].  
149 Women were asked "How long have you had symptoms of heavy menstrual bleeding", with "2  
150 months or less", "more than 2 months but less than 1 year", "more than 1 year" and "don't know" as  
151 possible response categories. For analysis, duration of symptoms was grouped as "<1 year", "≥1  
152 year" with "don't know" coded as missing. Levels of missing data on HMB symptoms and health-  
153 related quality of life were low (2.2% for severity, 4.8% for condition-specific and 9.9% for generic  
154 quality of life and 3.0% for symptom duration).  
155

156 Age was categorised as 18-34, 35-39, 40-44, 45-49, ≥50 years for analysis. Women reported their  
157 ethnicity as "white", "mixed", "Asian or Asian British", "black or black British", "Chinese" or "other".  
158 For analysis, the "mixed", "Chinese" and "other" groups were combined as "other" due to small  
159 numbers of women reporting these ethnicities. Self-reported height and weight data were used to  
160 derive body mass index (BMI), categorised according to WHO groups as ≤25, 25-30, and ≥30[23].  
161 Women reported how many times they had seen their GP for HMB in the year prior to their first  
162 outpatient visit, and this was grouped as 0, 1-2, 3-4, >4 for analysis ("don't know" was coded as  
163 missing).  
164

1  
2  
3 165 Women reported their parity, grouped for analysis as “nulliparous” or “parous”. Women were also  
4 166 asked “Have you been told by a doctor that you have any of the following: “heart disease (for  
5 167 example angina, heart attack or heart failure), high blood pressure, lung disease (for example  
6 168 chronic bronchitis or emphysema), diabetes, depression, thyroid disorder, kidney disease, cancer  
7 169 (within the last 5 years). For analysis, the number of co-morbidities reported was grouped as 0, 1,  
8  
9  
10  
11 170  $\geq 2$ .

171

172 Information on socio-economic deprivation (Index of Multiple Deprivation (IMD)) was extracted  
173 from HES and PEDW. IMD is a relative measure of deprivation for small areas across a number of  
174 domains, including income, employment, education and housing. We used quintiles of IMD (level 1 =  
175 most deprived areas, level 5 = least deprived areas). The methods used to calculate IMD scores in  
176 each country in the UK are similar but not directly comparable[24]. For analysis, we generated a  
177 combined measure of deprivation for England and Wales by assigning those in each country-specific  
178 quintile to the same quintile in a combined measure. This preserved women’s relative deprivation  
179 position within each country.

180

### 181 **Statistical analysis**

182 Means and standard deviations (SD) and proportions were used to describe the cohort. Regression  
183 analyses were used to examine the relationship between age, ethnicity and socio-economic  
184 deprivation and each of the outcomes. For the scores representing symptom severity, condition  
185 specific and generic quality of life, multivariable linear regression was used to calculate adjusted  
186 differences in mean scores. For duration of symptoms (<1 year and  $\geq 1$  year), multivariable logistic  
187 regression was used to calculate adjusted odds ratios (OR). Regression models included BMI, parity  
188 and number of co-morbidities as potential confounders. Levels of missing data were low (<3%) for  
189 the majority of variables with the exception of ethnicity (7% missing) and BMI (approximately 23%  
190 missing, Table 1). Missing values for explanatory variables were imputed using multiple imputation  
191 by chained equations[25] and statistical coefficients were obtained using ten imputed datasets and  
192 combined using Rubin’s rules[26].

193

### 194 **ETHICAL APPROVAL**

195 The data are from the National Heavy Menstrual Bleeding (HMB) Audit. Based on the Health  
196 Research Authority’s guidance, audits are regulated as standard clinical practice outside of the  
197 Research Ethics Service[27].

198

**RESULTS****Patient Characteristics**

15,325 eligible women completed the questionnaire at their first visit to a gynaecology outpatient department and 15,294 (99.8%) could be linked to HES or PEDW which provided information on socioeconomic deprivation. The women's mean age was 42.3 years (SD 7.6) and BMI 27.3 (SD 5.4) (Table 1). About one in five were nulliparous and one in three reported at least one co-morbidity. 11.7% of women reported a non-white ethnicity, with black or black British (5.4%) and Asian or Asian British (4.3%) being the largest non-white groups. Women in the two least socioeconomically deprived national quintile groups (18.7% in quintile 4 and 15.8% in quintile 5) were under-represented given that per definition 20% of women are expected to be in each group. The distribution of symptom severity, condition-specific and generic quality of life and symptom duration by level of deprivation did not vary significantly between women in England and Wales (data not shown).

**Table 1: Patient characteristics at the first gynaecology outpatient visit for HMB (% and number unless otherwise stated)**

The mean score for symptom severity was 61.8 (standard error (SE) 0.17) with 74.0% of women reporting that they had HMB symptoms for more than one year. The mean score for condition-specific quality of life was 34.7 (SE: 0.18) and for generic quality of life 0.65 (SE: 0.28) (Table 2).

**Severity of symptoms and quality-of-life by socioeconomic deprivation**

Symptom severity scores gradually increased with increasing socioeconomic deprivation (Table 2). Condition-specific and generic quality of life scores also showed a worsening gradient according to deprivation. In other words, women living in more deprived areas reported more severe symptoms (difference -6.1; 95%CI -7.2 to -4.9, between least and most deprived quintile) and a poorer quality of life (difference 6.3; 95%CI 5.1 to 7.5) at their first gynaecology outpatient visit for HMB than those living in less deprived areas.

**Severity of symptoms and quality-of-life by age and ethnicity**

Symptom severity showed a gradual decrease with increasing age, indicating that older women reported less severe symptoms at their first outpatient visit for HMB (difference -5.9; 95% CI: -7.2 to -4.6 between oldest and youngest age groups, Table 2). Quality of life scores based on both the condition-specific and the generic measure increased with increasing age, which shows that older

233 women reported better quality of life at their first HMB outpatient visit (difference 7.3; 95% CI: 5.9  
234 to 8.7) between oldest and youngest age groups). Symptom severity also varied by ethnicity: black  
235 and Asian women reported less severe symptoms than white women (difference compared to white  
236 women -1.9 and -2.4 respectively, Table 2). Condition-specific quality of life did not vary significantly  
237 by ethnicity, whereas compared to white women, Asian woman reported lower generic quality of  
238 life scores (Table 2).

239

#### 240 **Duration of symptoms**

241 Women living in the most deprived areas were slightly less likely to report having had HMB  
242 symptoms for  $\geq 1$  year than those living in the less deprived areas. Women aged between 35 and 49  
243 years were more likely to report having experienced HMB symptoms for  $\geq 1$  year than those younger  
244 than 35. Compared to white women, black women were more likely than white women to report  
245 symptoms for  $\geq 1$  year and Asian women were less likely.

246

#### 247 **Table 2. Severity and duration of symptoms at the first outpatient visit, by age group, ethnicity 248 and socioeconomic deprivation**

249

### 250 **DISCUSSION**

#### 251 **Main Findings**

252 Women living in more socioeconomically deprived areas reported more severe HMB symptoms and  
253 poorer quality of life at their first gynaecology outpatient visit. Older women reported less severe  
254 symptoms and better quality of life than younger women. Reported symptom severity also varied by  
255 ethnicity with black and Asian women reporting less severe symptoms than women from white  
256 ethnic backgrounds.

257

258 Three quarters of the women referred to secondary care reported that they had had symptoms of  
259 HMB for at least one year and women living in the most deprived areas were least likely to report  
260 having had HMB symptoms for  $\geq 1$  year.

261

#### 262 **Interpretation**

263 More severe symptoms and poorer quality of life at first outpatient visit by socioeconomic  
264 deprivation, after adjustment for possible differences in age, ethnicity and body mass index, reflect  
265 that women from more deprived backgrounds report more severe problems at the start of  
266 treatment in secondary care but they were least likely to report that they had symptoms for at least

1  
2  
3 267 one year. The difference in the symptom severity score between women from the least and the  
4 268 most deprived areas of about 6 is likely to be clinically significant, given that women who completed  
5 269 a questionnaire one year after their first outpatient visit and reported that their symptoms were 'a  
6 270 little better' had severity scores that were, on average, approximately 10 lower than women who  
7 271 reported (in response to same questionnaire) that their symptoms were 'about the same'. There is  
8 272 evidence that people from more socioeconomically deprived backgrounds may be more accepting of  
9 273 symptoms, chronic pain or poorer health-related quality of life[28], which is a possible explanation  
10 274 for these finding. Conversely, those from more affluent socioeconomic backgrounds have been  
11 275 found to report greater impact of health conditions on their health and their quality of life, which  
12 276 may be linked to their higher expectations about health and life in general[29].  
13  
14  
15  
16  
17  
18  
19

20 277  
21 278 Alternative explanations are that differences in symptom severity, quality of life and symptom  
22 279 reflect inequitable access as well as differences in the nature and causes of HMB. Age is often found  
23 280 to be associated with symptom severity<sup>15, 16</sup>[30, 31]. Black women are 2-3 times more likely to have  
24 281 fibroids and endometriosis[31]. Accepting heavy periods as normal vary by ethnicity and other social  
25 282 factors, which in turn can also lead to reluctance to seek care for HMB[16]. Ethnographic research  
26 283 suggests that some women of South Asian ethnicity do not seek healthcare for HMB due to the  
27 284 belief that heavy periods cleanse the body[17]. We adjust for patient-level characteristics that may  
28 285 capture some of these differences but were unable to adjust for other unmeasured potential  
29 286 confounders.  
30  
31  
32  
33  
34  
35

36 287  
37 288 The observation that women living in the most socio-economically deprived areas reported the most  
38 289 severe symptoms but were least likely to report having had symptoms for  $\geq 1$  year may reflect the  
39 290 wording of the question; women were asked "How long have you had symptoms of heavy menstrual  
40 291 bleeding?" and women whose symptom severity had worsened may have reported the duration of  
41 292 the most recent severity, rather than the overall duration.  
42  
43  
44

45 293  
46 294 A key question is whether the observed differences in symptom severity and condition-specific  
47 295 quality of life at the women's first gynaecology outpatient visit are related to differences in women's  
48 296 health seeking behaviour or to differences in how GPs and gynaecologists decide on whether to  
49 297 refer a woman with HMB. A study of self-reported health-care seeking behaviour in England did not  
50 298 find evidence that inequality in access to secondary care according to socioeconomic or ethnic  
51 299 backgrounds is related to patients being less likely to go to their GP or a hospital's emergency  
52 300 department[32]. Similarly, a survey of patients with chronic joint pain found that the proportions of  
53  
54  
55  
56  
57  
58  
59  
60



1  
2  
3 301 patients who said that they were seeking help from their GP did not differ according to their  
4 302 socioeconomic background[33]. On the other hand, a national study including 130,000 patients from  
5 303 more than 300 primary care practices in England found that older patients and those from more  
6 304 deprived areas were less likely to be referred to secondary care[34].  
7  
8  
9

305

### 306 **Implications for policy and practice**

10  
11  
12 307 In the UK, national guidelines for the management of HMB have been developed by the National  
13 308 Institute for Health and Care Excellence and the Royal College of Obstetricians and Gynaecologists  
14 309 (RCOG)[11, 35, 36]. The National HMB Audit carried out a survey of NHS hospitals in England and  
15 310 Wales to find out how care for women with HMB is organised and delivered at local levels. It found  
16 311 that key systems such as the availability of local protocols, which specified local arrangements for  
17 312 patient referral and management in response to the NICE guidelines, were reported only by 30% of  
18 313 hospitals[37]. Wide variation in the investigations and treatments that were offered to women with  
19 314 HMB in primary care were also noted. The implementation of locally agreed referral pathways,  
20 315 recommended by the RCOG, will help to reduce this variation[38].  
21  
22  
23  
24  
25  
26

316

27  
28 317 Women with HMB in this study reported substantially worse QoL (EQ-5D mean: 0.65, SD: 0.33) than  
29 318 the population average for women in England (mean: 0.85, SD: 0.003), and compared to women  
30 319 with incontinence (mean: 0.73, SD: 0.26)[39, 40]. This reinforces the need for interventions to focus  
31 320 on improving women's quality of life, as recommended by recent NICE guidelines[11]. Obesity can  
32 321 be associated with HMB so health promotion interventions around diet and exercise could  
33 322 supplement HMB-specific interventions. Criteria for what constitutes a meaningful improvement in  
34 323 quality of life are less clear. Awareness raising activities relating to the availability of treatments for  
35 324 HMB could increase healthcare seeking before symptoms become severe. This may be particularly  
36 325 beneficial for those from more deprived background who may be more accepting of chronic pain  
37 326 and worse quality-of-life. In highlighting differences in symptom severity at their first gynaecology  
38 327 outpatient visit, our findings draw attention to the lack of an agreed threshold for referral of women  
39 328 with HMB to secondary care in terms of symptom severity and quality of life. Routine measurement  
40 329 of both symptom severity and quality of life may be required to stimulate greater consistency in  
41 330 referral thresholds but validated instruments specific to HMB are currently lacking. As there is no  
42 331 widely used condition-specific measure of condition-specific quality of life for HMB, the National  
43 332 HMB Audit used the Uterine Fibroid Symptom and Quality of Life (UFS-QOL) questionnaire, adapted  
44 333 for a UK population of women with HMB[18].  
45  
46  
47  
48  
49  
50  
51  
52  
53  
54

334



1  
2  
3 335 **Strengths and Limitations**

4 336 This study is the first to examine the relationship between sociodemographic factors and patient-  
5  
6 337 reported HMB symptom severity, quality of life and symptom duration in an outpatient setting. It  
7  
8 338 used data collected by a national audit carried out in England and Wales, which produced a relatively  
9  
10 339 large sample. We estimated that the National HMB Audit recruited about 30% of all eligible women.  
11  
12 340 There is no direct way to compare the characteristics of the women who were recruited and those  
13  
14 341 who were not. However, the characteristics of the women who were recruited were broadly  
15  
16 342 representative of the UK population in terms of the distributions of ethnicity and age[41, 42].  
17  
18 343

19 344 Survey questionnaires were only available in the English language, so non-English speakers are likely  
20  
21 345 to be under-represented. On the other hand, case ascertainment varied by provider and women  
22  
23 346 from providers with higher case ascertainment (ascertainment > 45%) were more often from a non-  
24  
25 347 white ethnic background and a more deprived areas than those referred to providers with lower  
26  
27 348 case ascertainment[4] which suggests that the impact of not having questionnaires in other  
28  
29 349 languages is likely to be small.

30 350

31 351 **CONCLUSION**

32 352 About three in four women at their first visit to a gynaecological outpatient clinic for HMB in England  
33  
34 353 and Wales reported that they had symptoms at least one year before they were referred to  
35  
36 354 secondary care. Women from more deprived areas reported more severe HMB symptoms and a  
37  
38 355 poorer quality of life, which demonstrates a higher burden of disease at the time of referral to  
39  
40 356 secondary care. Primary and secondary care providers should examine to what extent these  
41  
42 357 differences reflect barriers in access to gynaecological secondary care services or women's  
43  
44 358 perceptions of their menstrual problems and health-seeking behaviour.

45 359

46 360

47 361

**362 ACKNOWLEDGEMENTS**

363 We would firstly like to thank all NHS providers and patients that participated in the National HMB  
364 Audit. We would also like to thank Healthcare Quality Improvement Partnership, Health and Social  
365 Care Information Centre and the Royal College of Surgeons of England for providing the authors with  
366 the data required for this study. This publication is based on data collected by or on behalf of the  
367 Healthcare Quality Improvement Partnership, who have no responsibility or liability for the accuracy,  
368 currency, reliability and/or correctness of this publication.

**370 DATA SHARING STATEMENT**

371 The data analysed were collected as part of a national clinical audit and linked to administrative  
372 hospital data (Hospital Episode Statistics). They were shared with the authors by the Healthcare  
373 Quality Improvement Partnership, Health and Social Care Information Centre and the Royal College  
374 of Surgeons of England. The data cannot be shared further without formal application to the data  
375 providers.

**377 CONTRIBUTORS**

378 The research question was derived by TM and JvdM. Data collection was supported directly by AK,  
379 IGU, DC, LBM and through advice by JS, TM, JvdM. Data analysis was performed by AK, IGU & RSG.  
380 All authors contributed to the writing of the manuscript.

**382 COMPETING INTERESTS**

383 All authors have completed the ICMJE uniform disclosure form at [www.icmje.org/coi\\_disclosure.pdf](http://www.icmje.org/coi_disclosure.pdf)  
384 and declare: all authors except RSG had financial support from the Healthcare Quality Improvement  
385 Partnership as part of the National Clinical Audit and Patient Outcomes Programme for the  
386 submitted work; no financial relationships with any organisations that might have an interest in the  
387 submitted work in the previous three years; no other relationships or activities that could appear to  
388 have influenced the submitted work.

**390 FUNDING**

391 The authors declare no funding for the writing of this manuscript. The National Heavy Menstrual  
392 Bleeding (HMB) Audit was funded by the Healthcare Quality Improvement Partnership (HQIP) as part  
393 of the National Clinical Audit and Patient Outcomes Programme (NCAPOP). The audit was led by the  
394 Royal College of Obstetricians and Gynaecologists.

395

## 396 REFERENCES

- 397 1. Royal College of Obstetricians and Gynaecologists, London School of Hygiene & Tropical  
398 Medicine, Ipsos MORI, *National Heavy Menstrual Bleeding Audit: Third Annual Report*. 2013,  
399 RCOG Press.
- 400 2. Coulter, A., et al., *Outcomes of referrals to gynaecology outpatient clinics for menstrual  
401 problems: an audit of general practice records*. British Journal of Obstetrics and  
402 Gynaecology, 1991. **98**(8): p. 789-796.
- 403 3. Cromwell, D., et al., *Surgery for menorrhagia within English regions: variation in rates of  
404 endometrial ablation and hysterectomy*. BJOG, 2009. **116**(10): p. 1373-9.
- 405 4. Royal College of Obstetricians and Gynaecologists, London School of Hygiene & Tropical  
406 Medicine, Ipsos MORI, *National Heavy Menstrual Bleeding Audit: Final Report*. 2014, RCOG  
407 Press.
- 408 5. Karlsson, T.S., L.B. Marions, and M.G. Edlund, *Heavy menstrual bleeding significantly affects  
409 quality of life*. Acta Obstet Gynecol Scand., 2014. **93**(1): p. 52-7. doi: 10.1111/aogs.12292.  
410 Epub 2013 Nov 25.
- 411 6. Shankar, M., C. Chi, and R.A. Kadir, *Review of quality of life: menorrhagia in women with or  
412 without inherited bleeding disorders*. Haemophilia., 2008. **14**(1): p. 15-20. Epub 2007 Oct 24.
- 413 7. Sule Gokyildiz, E.A., Nezihe Kizilkaya Beji, Meltem Mecdi *The Effects of Menorrhagia on  
414 Women's Quality of Life: A Case-Control Study*. ISRN Obstet Gynecol., 2013. **918179**.
- 415 8. Wang, W., et al., *Iron deficiency and fatigue in adolescent females with heavy menstrual  
416 bleeding*. Haemophilia, 2013. **19**(2): p. 225-230.
- 417 9. Cohen, B. and Y. Gibor, *Anemia and menstrual blood loss*. Obstetric and Gynecological  
418 Survery, 1980. **35**(10): p. 597-618.
- 419 10. Bitzer, J., M. Serrani, and A. Lahav, *Women's attitudes towards heavy menstrual bleeding,  
420 and their impact on quality of life*. Journal of Contraception, 2013. **4**: p. 21–28. .
- 421 11. National Collaborating Centre for Women's and Children's Health, National Institute for  
422 Health and Clinical Excellence (NICE), *Heavy Menstrual Bleeding. Clinical Guideline No. 44*.  
423 2007, NICE.
- 424 12. Harlow, S.D. and B. Campbell, *Ethnic differences in the duration and amount of menstrual  
425 bleeding during the postmenarcheal period*. Am J Epidemiol., 1996. **144**(10): p. 980-8.
- 426 13. National Health Service (NHS) UK. *Heavy periods (menorrhagia) - Causes*. 20/02/2015];  
427 Available from: <http://www.nhs.uk/Conditions/Periods-heavy/Pages/Causes.aspx>.
- 428 14. Mayo Clinic. *Menorrhagia (heavy menstrual bleeding)*. 20/02/2015]; Available from:  
429 <http://www.mayoclinic.org/diseases-conditions/menorrhagia/basics/causes/con-20021959>.
- 430 15. Barbara S. Apgar, A.H.K., Uche George-Nwogu, Anne Kittendorf, *Treatment of Menorrhagia*.  
431 2007: American Family Physician. p. 1813-1819.
- 432 16. O'Flynn, N., *Menstrual symptoms: the importance of social factors in women's experiences*.  
433 British Journal of General Practice, 2006. **56**(533): p. 950-957.
- 434 17. Chapple, A., *Iron deficiency anaemia in women of South Asian descent: a qualitative study*.  
435 Ethnicity and Health, 1998. **3**(3): p. 199-212.
- 436 18. Royal College of Obstetricians and Gynaecologists, London School of Hygiene & Tropical  
437 Medicine, Ipsos MORI, *National Heavy Menstrual Bleeding Audit: First Annual Report*. 2011,  
438 RCOG Press.
- 439 19. Royal College of Obstetricians and Gynaecologists, London School of Hygiene & Tropical  
440 Medicine, Ipsos MORI, *National Heavy Menstrual Bleeding Audit: Second Annual Report*.  
441 2012, RCOG Press.
- 442 20. Spies, J., et al., *The UFS-QOL, a New Disease-Specific Symptom and Health-Related Quality of  
443 Life Questionnaire for Leiomyomata*. Obstetrics and Gynecology, 2002. **99**(2): p. 290-300.
- 444 21. The EuroQol Group, *EuroQol-a new facility for the measurement of health-related quality of  
445 life*. Health Policy, 1990. **16**(3): p. 199-208.

- 1  
2  
3 446 22. Kind, P., G. Hardman, and S. Macran, *UK Population Norms for EQ-5D: York Centre for Health*  
4 447 *Economics Discussion Paper 172*. 1992.
- 5 448 23. World Health Organisation. *BMI Classification*. Global Database on Body Mass Index  
6 449 06/10/2016]; Available from: [http://apps.who.int/bmi/index.jsp?introPage=intro\\_3.html](http://apps.who.int/bmi/index.jsp?introPage=intro_3.html).
- 7 450 24. Payne, R. and G. Abel, *UK indices of multiple deprivation - a way to make comparisons across*  
8 451 *constituent countries easier*. Health Statistics Quarterly, 2012. **53**.
- 9 452 25. Royston P, *Multiple imputation of missing values*. The Stata Journal, 2005 **5**: p. 527-36.
- 10 453 26. Rubin D, *Multiple imputation for non-response in surveys*. 1987, New York: John Wiley &  
11 454 Sons.
- 12 455 27. Health Research Authority, *Defining research*. 2016, Health Research Authority: London.
- 13 456 28. Delpierre, C., et al., *Using self-rated health for analysing social inequalities in health: a risk*  
14 457 *for underestimating the gap between socioeconomic groups?* Journal of Epidemiology and  
15 458 Community Health, 2009. **63**: p. 426-432.
- 16 459 29. Ross, C. and M. Van Willigen, *Education and the subjective quality of life*. Journal of Health  
17 460 and Social Behaviour, 1997. **38**: p. 275-297.
- 18 461 30. Janssen, C.A., P.C. Scholten, and A.P. Heintz, *Menorrhagia--a search for epidemiological risk*  
19 462 *markers*. Maturitas., 1997. **28**(1): p. 19-25.
- 20 463 31. National Institute for Health and Care Excellence (NICE), *NICE support for commissioning for*  
21 464 *heavy menstrual bleeding*. 2013.
- 22 465 32. Adamson, J., et al., *Ethnicity, socioeconomic position and gender: do they affect reported*  
23 466 *health-care seeking behaviour*. Social Science and Medicine, 2003. **57**(5): p. 895-904.
- 24 467 33. Thorstensson, C., et al., *Help-seeking behaviour among people living with chronic hip or knee*  
25 468 *pain in the community*. BMC Musculoskeletal Disorders, 2009. **10**(153).
- 26 469 34. McBride, D., et al., *Explaining variation in referral from primary to secondary care: cohort*  
27 470 *study*. BMJ, 2010. **341**: p. c6267.
- 28 471 35. National Institute for Health and Care Excellence (NICE), *Heavy Menstrual Bleeding. NICE*  
29 472 *quality standard 47*. 2013, NICE.
- 30 473 36. Royal College of Obstetricians and Gynaecologists, *Standards for Gynaecology. Report of a*  
31 474 *Working Party*. 2008, RCOG.
- 32 475 37. Cox, S., et al., *The delivery of heavy menstrual bleeding services in England and Wales after*  
33 476 *publication of national guidelines: a survey of hospitals*. BMC Health Services Research,  
34 477 2013. **13**: p. 491.
- 35 478 38. Royal College of Obstetricians and Gynaecologists, *Advice for Heavy Menstrual Bleeding*  
36 479 *(HMB) Services and Commissioners*. 2014.
- 37 480 39. The EuroQol Group, *Self-Reported Population Health: An International Perspective based on*  
38 481 *EQ-5D*, A. Szende, B. Janssen, and J. Cabases, Editors. 2014, Springer Netherlands.
- 39 482 40. Harvie, H.S., et al., *Validity of utility measures for women with urge, stress, and mixed*  
40 483 *urinary incontinence*. Am J Obstet Gynecol., 2014. **210**(1): p. 85.e1-6. doi:  
41 484 10.1016/j.ajog.2013.09.025. Epub 2013 Sep 18.
- 42 485 41. Office for National Statistics, *Office for National Statistics, 2001 Census: Social Focus in Brief -*  
43 486 *Ethnicity 2002*. 2002.
- 44 487 42. Office for National Statistics, *Office for National Statistics, 2011 Census: Ethnicity and*  
45 488 *National Identity in England and Wales 2011*. 2012.
- 46 489  
47 490  
48  
49  
50  
51  
52  
53  
54  
55  
56  
57  
58  
59  
60

491 **Table 1: Patient characteristics at the first gynaecology outpatient visit for HMB**  
 492 **(% and number unless otherwise stated)**

|                                                 | Full Cohort<br>(n=15,325) |
|-------------------------------------------------|---------------------------|
| Age, mean (sd) in years                         | 42.3 (7.6)                |
| Age groups                                      |                           |
| 18-34                                           | 14.9 (2,283)              |
| 35-39                                           | 12.9 (1,971)              |
| 40-44                                           | 26.6 (4,071)              |
| 45-49                                           | 31.3 (4,794)              |
| ≥50                                             | 14.4 (2,206)              |
| Body mass index, mean (sd) in kg/m <sup>2</sup> | 27.3 (5.4)                |
| Body mass index, categories                     |                           |
| ≤25                                             | 39.6 (4,681)              |
| 25-30                                           | 31.7 (3,739)              |
| ≥30                                             | 28.7 (3,392)              |
| Missing                                         | 3,513                     |
| Parity                                          |                           |
| Nulliparous                                     | 17.0 (2,530)              |
| Parous                                          | 83.0 (12,338)             |
| Missing                                         | 457                       |
| Number of reported comorbidities                |                           |
| 0                                               | 66.3 (10,165)             |
| 1                                               | 25.3 (3,878)              |
| ≥2                                              | 8.4 (1,282)               |
| Ethnicity                                       |                           |
| White                                           | 88.3 (12,614)             |
| Asian or Asian British                          | 4.3 (607)                 |
| Black or Black British                          | 5.4 (770)                 |
| Other                                           | 2.0 (292)                 |
| Missing                                         | 1,042                     |
| Socioeconomic deprivation (IMD)                 |                           |
| Quintile 1 (most deprived)                      | 23.5 (3,418)              |
| Quintile 2                                      | 21.7 (3,159)              |
| Quintile 3                                      | 20.2 (2,944)              |
| Quintile 4                                      | 18.7 (2,720)              |
| Quintile 5 (least deprived)                     | 15.8 (2,304)              |
| Missing                                         | 780                       |

493

**Table 2. Severity and duration of symptoms at the first outpatient visit, by age group, ethnicity and socioeconomic deprivation**

|                                    | Severity score<br>(0 best and 100 worst)<br>(n=14,990) |                                                 |         | Condition-specific quality of life<br>(0 worst and 100 best)<br>(n=14,586) |                                                 |         | Generic quality of life<br>(0 death and 1 perfect health)<br>(n=13,802) |                                             |         | Symptoms ≥1 year<br>(n=14,866) |                                         |          |
|------------------------------------|--------------------------------------------------------|-------------------------------------------------|---------|----------------------------------------------------------------------------|-------------------------------------------------|---------|-------------------------------------------------------------------------|---------------------------------------------|---------|--------------------------------|-----------------------------------------|----------|
|                                    | Mean score<br>(se)                                     | Adjusted <sup>i</sup><br>difference<br>(95% CI) | p-value | Mean score<br>(se)                                                         | Adjusted <sup>i</sup><br>difference<br>(95% CI) | p-value | Mean score<br>(se)                                                      | Adjusted <sup>i</sup><br>difference(95% CI) | p-value | % (se)                         | Adjusted <sup>i</sup><br>OR<br>(95% CI) | p-value  |
| 11 Total                           | 61.8 (0.17)                                            |                                                 |         | 34.7 (0.18)                                                                |                                                 |         | 0.65 (0.28)                                                             |                                             |         | 74.0 (0.36)                    |                                         |          |
| 12 Age group                       |                                                        |                                                 |         |                                                                            |                                                 |         |                                                                         |                                             |         |                                |                                         |          |
| 13 18-34                           | 63.1 (0.44)                                            | -                                               |         | 33.2 (0.48)                                                                | -                                               |         | 0.61 (0.007)                                                            | -                                           |         | 70.7 (0.98)                    | -                                       |          |
| 14 35-39                           | 62.9 (0.49)                                            | -1.59 (-2.89, -0.29)                            |         | 33.3 (0.51)                                                                | 1.75 (0.39, 3.10)                               |         | 0.63 (0.008)                                                            | 0.03 (0.01, 0.05)                           |         | 74.8 (1.00)                    | 1.25 (1.09, 1.44)                       |          |
| 15 40-44                           | 62.5 (0.33)                                            | -2.17 (-3.30, -1.04)                            | p<0.001 | 33.7 (0.35)                                                                | 2.59 (1.40, 3.77)                               | p<0.001 | 0.64 (0.005)                                                            | 0.04 (0.02, 0.06)                           | p<0.001 | 76.8 (0.67)                    | 1.39 (1.23, 1.58)                       | p<0.001  |
| 16 45-49                           | 61.3 (0.31)                                            | -3.36 (-4.47, -2.51)                            |         | 35.4 (0.33)                                                                | 4.23 (3.06, 5.39)                               |         | 0.67 (0.005)                                                            | 0.07 (0.05, 0.08)                           |         | 74.2 (0.64)                    | 1.20 (1.06, 1.35)                       |          |
| 17 ≥50                             | 59.0 (0.47)                                            | -5.88 (-7.19, -4.58)                            |         | 38.2 (0.51)                                                                | 7.31 (5.93, 8.68)                               |         | 0.70 (0.007)                                                            | 0.10 (0.07, 0.12)                           |         | 70.9 (0.98)                    | 1.01 (0.88, 1.16)                       |          |
| 18 Ethnicity                       |                                                        |                                                 |         |                                                                            |                                                 |         |                                                                         |                                             |         |                                |                                         |          |
| 19 White                           | 61.9 (0.19)                                            | -                                               |         | 34.8 (0.20)                                                                | -                                               |         | 0.66 (0.003)                                                            | -                                           |         | 74.1 (0.38)                    | -                                       |          |
| 20 Black or Black British          | 61.5 (0.82)                                            | -1.93 (-3.51, -0.35)                            |         | 35.0 (0.86)                                                                | 1.45 (-0.16, 3.06)                              |         | 0.62 (0.01)                                                             | -0.01 (-0.08, 0.02)                         |         | 79.4 (1.47)                    | 1.34 (1.11, 1.62)                       |          |
| 21 Asian or Asian British          | 60.7 (1.02)                                            | -2.38 (-4.25, -0.51)                            | P=0.011 | 34.2 (1.07)                                                                | 1.32 (-0.59, 3.22)                              | 0.1392  | 0.58 (0.02)                                                             | -0.05 (-0.88, -0.01)                        | p<0.001 | 66.1 (1.49)                    | 0.70 (0.58, 0.85)                       | p<0.001  |
| 22 Other                           | 61.5 (1.33)                                            | -0.46 (-3.09, 2.16)                             |         | 33.9 (1.41)                                                                | -1.01 (-3.54, 1.51)                             |         | 0.60 (0.02)                                                             | -0.05 (-0.30, -0.20)                        |         | 72.3 (2.67)                    | 0.92 (0.70, 1.20)                       |          |
| 23 Socioeconomic deprivation (IMD) |                                                        |                                                 |         |                                                                            |                                                 |         |                                                                         |                                             |         |                                |                                         |          |
| 24 Quintile 1 (most deprived)      | 65.5 (0.37)                                            | -                                               |         | 30.5 (0.39)                                                                | -                                               |         | 0.55 (0.007)                                                            | -                                           |         | 72.0 (0.78)                    | -                                       |          |
| 25 Quintile 2                      | 63.5 (0.38)                                            | -1.53 (-2.57, 0.50)                             |         | 33.1 (0.40)                                                                | 1.82 (0.75, 2.90)                               |         | 0.62 (0.006)                                                            | 0.06 (0.05, 0.08)                           |         | 73.6 (0.80)                    | 1.11 (0.99, 1.24)                       |          |
| 26 Quintile 3                      | 61.6 (0.39)                                            | -4.22 (-4.30, -2.12)                            | p<0.001 | 35.0 (0.41)                                                                | 3.44 (2.34, 4.54)                               | p<0.001 | 0.67 (0.006)                                                            | 0.09 (0.08, 0.11)                           | p<0.001 | 75.1 (0.81)                    | 1.20 (1.06, 1.34)                       | P=0.0091 |
| 27 Quintile 4                      | 59.5 (0.41)                                            | -6.02 (-6.02, -3.87)                            |         | 36.8 (0.43)                                                                | 4.78 (3.66, 5.90)                               |         | 0.71 (0.006)                                                            | 0.13 (0.12, 0.15)                           |         | 74.5 (0.85)                    | 1.16 (1.03, 1.31)                       |          |
| 28 Quintile 5 (least deprived)     | 58.2 (0.44)                                            | -6.07 (-7.23, -4.91)                            |         | 38.6 (0.46)                                                                | 6.29 (5.10, 7.48)                               |         | 0.73 (0.006)                                                            | 0.14 (0.13, 0.16)                           |         | 75.1 (0.91)                    | 1.21 (1.07, 1.37)                       |          |

Footnote: All multivariable models were adjusted for body mass index, parity, and number of co-morbidities. P-values based on Wald test

**STROBE 2007 (v4) Statement—Checklist of items that should be included in reports of *cohort studies***

| Section/Topic                | Item # | Recommendation                                                                                                                                                                       | Reported on page # |
|------------------------------|--------|--------------------------------------------------------------------------------------------------------------------------------------------------------------------------------------|--------------------|
| Title and abstract           | 1      | (a) Indicate the study's design with a commonly used term in the title or the abstract                                                                                               | 1                  |
|                              |        | (b) Provide in the abstract an informative and balanced summary of what was done and what was found                                                                                  | 2                  |
| <b>Introduction</b>          |        |                                                                                                                                                                                      |                    |
| Background/rationale         | 2      | Explain the scientific background and rationale for the investigation being reported                                                                                                 | 4                  |
| Objectives                   | 3      | State specific objectives, including any prespecified hypotheses                                                                                                                     | 4                  |
| <b>Methods</b>               |        |                                                                                                                                                                                      |                    |
| Study design                 | 4      | Present key elements of study design early in the paper                                                                                                                              | 5-6                |
| Setting                      | 5      | Describe the setting, locations, and relevant dates, including periods of recruitment, exposure, follow-up, and data collection                                                      | 5                  |
| Participants                 | 6      | (a) Give the eligibility criteria, and the sources and methods of selection of participants. Describe methods of follow-up                                                           | 5                  |
|                              |        | (b) For matched studies, give matching criteria and number of exposed and unexposed                                                                                                  | N/A                |
| Variables                    | 7      | Clearly define all outcomes, exposures, predictors, potential confounders, and effect modifiers. Give diagnostic criteria, if applicable                                             | 5-6                |
| Data sources/<br>measurement | 8*     | For each variable of interest, give sources of data and details of methods of assessment (measurement). Describe comparability of assessment methods if there is more than one group | 5-6                |
| Bias                         | 9      | Describe any efforts to address potential sources of bias                                                                                                                            |                    |
| Study size                   | 10     | Explain how the study size was arrived at                                                                                                                                            | 5, 7               |
| Quantitative variables       | 11     | Explain how quantitative variables were handled in the analyses. If applicable, describe which groupings were chosen and why                                                         | 5-6                |
| Statistical methods          | 12     | (a) Describe all statistical methods, including those used to control for confounding                                                                                                | 6-7                |
|                              |        | (b) Describe any methods used to examine subgroups and interactions                                                                                                                  | 6                  |
|                              |        | (c) Explain how missing data were addressed                                                                                                                                          | 7                  |
|                              |        | (d) If applicable, explain how loss to follow-up was addressed                                                                                                                       | N/A                |
|                              |        | (e) Describe any sensitivity analyses                                                                                                                                                | N/A                |
| <b>Results</b>               |        |                                                                                                                                                                                      |                    |



|                          |     |                                                                                                                                                                                                              |                        |
|--------------------------|-----|--------------------------------------------------------------------------------------------------------------------------------------------------------------------------------------------------------------|------------------------|
| Participants             | 13* | (a) Report numbers of individuals at each stage of study—eg numbers potentially eligible, examined for eligibility, confirmed eligible, included in the study, completing follow-up, and analysed            | 7                      |
|                          |     | (b) Give reasons for non-participation at each stage                                                                                                                                                         | Only one stage         |
|                          |     | (c) Consider use of a flow diagram                                                                                                                                                                           | Only one stage         |
| Descriptive data         | 14* | (a) Give characteristics of study participants (eg demographic, clinical, social) and information on exposures and potential confounders                                                                     | 7-8 and Table 1        |
|                          |     | (b) Indicate number of participants with missing data for each variable of interest                                                                                                                          | 8 (Table 1)            |
|                          |     | (c) Summarise follow-up time (eg, average and total amount)                                                                                                                                                  | N/A (Baseline)         |
| Outcome data             | 15* | Report numbers of outcome events or summary measures over time                                                                                                                                               | N/A (Baseline results) |
| Main results             | 16  | (a) Give unadjusted estimates and, if applicable, confounder-adjusted estimates and their precision (eg, 95% confidence interval). Make clear which confounders were adjusted for and why they were included | 8-9 (Table 2)          |
|                          |     | (b) Report category boundaries when continuous variables were categorized                                                                                                                                    | 8 (Table 2)            |
|                          |     | (c) If relevant, consider translating estimates of relative risk into absolute risk for a meaningful time period                                                                                             |                        |
| Other analyses           | 17  | Report other analyses done—eg analyses of subgroups and interactions, and sensitivity analyses                                                                                                               | N/A                    |
| <b>Discussion</b>        |     |                                                                                                                                                                                                              |                        |
| Key results              | 18  | Summarise key results with reference to study objectives                                                                                                                                                     | 9                      |
| <b>Limitations</b>       |     |                                                                                                                                                                                                              |                        |
| Interpretation           | 20  | Give a cautious overall interpretation of results considering objectives, limitations, multiplicity of analyses, results from similar studies, and other relevant evidence                                   | 9-10                   |
| Generalisability         | 21  | Discuss the generalisability (external validity) of the study results                                                                                                                                        | 11                     |
| <b>Other information</b> |     |                                                                                                                                                                                                              |                        |
| Funding                  | 22  | Give the source of funding and the role of the funders for the present study and, if applicable, for the original study on which the present article is based                                                | 7                      |

\*Give information separately for cases and controls in case-control studies and, if applicable, for exposed and unexposed groups in cohort and cross-sectional studies.

**Note:** An Explanation and Elaboration article discusses each checklist item and gives methodological background and published examples of transparent reporting. The STROBE checklist is best used in conjunction with this article (freely available on the Web sites of PLoS Medicine at <http://www.plosmedicine.org/>, Annals of Internal Medicine at <http://www.annals.org/>, and Epidemiology at <http://www.epidem.com/>). Information on the STROBE Initiative is available at [www.strobe-statement.org](http://www.strobe-statement.org).



# BMJ Open

## Sociodemographic differences in symptom severity and duration amongst women referred to secondary care for menorrhagia in England and Wales: a cohort study from the National Heavy Menstrual Bleeding Audit

|                                 |                                                                                                                                                                                                                                                                                                                                                                                                                                                                                                                                                                                                                                                                                                                                                                             |
|---------------------------------|-----------------------------------------------------------------------------------------------------------------------------------------------------------------------------------------------------------------------------------------------------------------------------------------------------------------------------------------------------------------------------------------------------------------------------------------------------------------------------------------------------------------------------------------------------------------------------------------------------------------------------------------------------------------------------------------------------------------------------------------------------------------------------|
| Journal:                        | <i>BMJ Open</i>                                                                                                                                                                                                                                                                                                                                                                                                                                                                                                                                                                                                                                                                                                                                                             |
| Manuscript ID                   | bmjopen-2017-018444.R2                                                                                                                                                                                                                                                                                                                                                                                                                                                                                                                                                                                                                                                                                                                                                      |
| Article Type:                   | Research                                                                                                                                                                                                                                                                                                                                                                                                                                                                                                                                                                                                                                                                                                                                                                    |
| Date Submitted by the Author:   | 11-Dec-2017                                                                                                                                                                                                                                                                                                                                                                                                                                                                                                                                                                                                                                                                                                                                                                 |
| Complete List of Authors:       | Kiran, Amit; London School of Hygiene & Tropical Medicine, Department of Health Services Research and Policy<br>Geary, Rebecca; London School of Hygiene and Tropical Medicine Faculty of Public Health and Policy, Department of Health Services Research and Policy<br>Gurol Urganci, Ipek; London School of Hygiene & Tropical Medicine, Health Services Research & Policy<br>Cromwell, David; London School of Hygiene & Tropical Medicine, Health Services Research & Policy<br>Bansi-Matharu, Loveleen; University College London, Institute for Global Health<br>Shakespeare, Judy; Royal College of General Practitioners<br>Mahmood, Tahir; Forth Park Hospital, Obstetrics and Gynaecology<br>van der Meulen, Jan; London School of Hygiene and Tropical Medicine |
| <b>Primary Subject Heading</b>: | Obstetrics and gynaecology                                                                                                                                                                                                                                                                                                                                                                                                                                                                                                                                                                                                                                                                                                                                                  |
| Secondary Subject Heading:      | Health services research, Patient-centred medicine                                                                                                                                                                                                                                                                                                                                                                                                                                                                                                                                                                                                                                                                                                                          |
| Keywords:                       | GYNAECOLOGY, EPIDEMIOLOGY, PRIMARY CARE                                                                                                                                                                                                                                                                                                                                                                                                                                                                                                                                                                                                                                                                                                                                     |
|                                 |                                                                                                                                                                                                                                                                                                                                                                                                                                                                                                                                                                                                                                                                                                                                                                             |

SCHOLARONE™  
Manuscripts

1  
2  
3 1 Sociodemographic differences in symptom severity and duration amongst  
4 2 women referred to secondary care for menorrhagia in England and Wales: a  
5 3 cohort study from the National Heavy Menstrual Bleeding Audit  
6 4  
7 5

8 5  
9 6 Kiran A<sup>1,2,†</sup>, Geary RS<sup>1,2,†</sup>, Gurol-Urganci I<sup>1,2</sup>, Cromwell DA<sup>1,2</sup>, Bansi-Matharu L<sup>3</sup>, Shakespeare J<sup>4</sup>,  
10 7 Mahmood T<sup>2</sup>, van der Meulen J<sup>1,2</sup>  
11 8  
12 9

13 10 <sup>1</sup>*Department of Health Services Research and Policy, London School of Hygiene & Tropical Medicine,*  
14 11 *London, UK*

15 12 <sup>2</sup>*Lindsay Stewart Centre for Audit and Clinical Informatics, Royal College of Obstetricians and*  
16 13 *Gynaecologists, London, UK*

17 14 <sup>3</sup>*Institute of Epidemiology & Health, University College London, London, UK*

18 15 <sup>4</sup>*Royal College of General Practitioners, London, UK*  
19 16

20 17 † A Kiran and RS Geary contributed equally to this paper  
21 18

22 19 Corresponding author: Rebecca Geary, 15-17 Tavistock Place, London School of Hygiene & Tropical  
23 20 Medicine, London, WC1H 9SH. Email: [rebecca.geary@lshtm.ac.uk](mailto:rebecca.geary@lshtm.ac.uk) Telephone: 02079272279  
24 21  
25  
26  
27  
28  
29  
30  
31  
32  
33  
34  
35  
36  
37  
38  
39  
40  
41  
42  
43  
44  
45  
46  
47  
48  
49  
50  
51  
52  
53  
54  
55  
56  
57  
58  
59  
60

1  
2  
3 22 **ABSTRACT**

4 23 **Objective** To examine symptom severity and duration at time of referral to secondary care for heavy  
5  
6 24 menstrual bleeding by socio-economic deprivation, age and ethnicity

7 25 **Design** Cohort analysis of data from the National Heavy Menstrual Bleeding Audit linked to Hospital  
8  
9 26 Episode Statistics data

10 27 **Setting** English and Welsh National Health Services (secondary care): February 2011 to January 2012

11 28 **Participants** 15,325 women aged 18 to 60 years in England and Wales who had a new referral for  
12  
13 29 heavy menstrual bleeding to a gynaecology outpatient department

14 30 **Methods** Multivariable linear regression to calculate adjusted differences in mean symptom severity  
15  
16 31 and quality of life scores at first outpatient visit. Multivariable logistic regression to calculate  
17  
18 32 adjusted odds ratios. Adjustment for body mass index, parity and co-morbidities.

19 33 **Primary Outcome Measures** Mean symptom severity score (0=best, 100=worst), mean condition-  
20  
21 34 specific quality of life score (0=worst, 100=best) and symptom duration ( $\geq 1$  year).

22 35 **Results** Women were on average 42 years old and 12% were non-white. Mean symptom severity  
23  
24 36 and condition-specific quality of life scores were 61.8 and 34.7. Almost three-quarters of women  
25  
26 37 (74%) reported having had symptoms for  $\geq 1$  year. Women from more deprived areas had more  
27  
28 38 severe symptoms at their first outpatient visit (difference -6.1; 95%CI -7.2:-4.9, between least and  
29  
30 39 most deprived quintile) and worse condition-specific quality of life (difference 6.3; 95%CI 5.1:7.5).  
31  
32 40 Symptom severity declined with age whilst quality of life improved.

33 41 **Conclusions** Women living in more deprived areas reported more severe HMB symptoms and poorer  
34  
35 42 quality of life at the start of treatment in secondary care. Providers should examine referral practices  
36  
37 43 to explore if these differences reflect women's health-seeking behaviour or how providers decide  
38  
39 44 whether or not to refer.

40  
41 46 **Funding** The National Heavy Menstrual Bleeding (HMB) Audit was funded by the Healthcare Quality  
42  
43 47 Improvement Partnership as part of the National Clinical Audit and Patient Outcomes Programme,  
44  
45 48 contract number HQIP NCA 004.

46 49 **Keywords** heavy menstrual bleeding, deprivation, ethnicity, health inequalities, patient-reported  
47  
48 50 outcomes, quality of life

49 51 **Tweetable abstract** Women from deprived areas referred with more severe heavy menstrual  
50  
51 52 bleeding, potentially reflecting inequity

52  
53  
54 53  
55  
56  
57  
58  
59  
60 54

1  
2  
3 55 **Strengths and limitations of this study**

- 4 56 • This study is the first to examine Heavy Menstrual Bleeding symptom severity and duration  
5  
6 57 at time of referral to secondary care  
7  
8 58 • The inclusion of patient-reported symptom severity and quality of life addresses a  
9  
10 59 knowledge gap about how women feel about their heavy menstrual bleeding  
11  
12 60 • As the data were collected by a national audit in England and Wales the sample is relatively  
13  
14 61 large, allowing comparisons between ethnic minority groups  
15  
16 62 • Even though the sample size is large, the National HMB Audit recruited approximately 30%  
17  
18 63 of eligible women. However, the characteristics of the women recruited were broadly  
19  
20 64 representative of the UK population in terms of ethnicity and age  
21  
22 65 • Linking audit data to administrative hospital data also allowed comparisons between  
23  
24 66 socioeconomic groups  
25  
26  
27  
28  
29  
30  
31  
32  
33  
34  
35  
36  
37  
38  
39  
40  
41  
42  
43  
44  
45  
46  
47  
48  
49  
50  
51  
52  
53  
54  
55  
56  
57  
58  
59  
60 67

## 68 INTRODUCTION

69 Heavy menstrual bleeding (HMB) is a common condition that affects one in four women of  
70 reproductive age. In England and Wales, an estimated 50,000 women with HMB are referred from  
71 primary care to secondary care gynaecology services provided by the National Health Service (NHS)  
72 every year[1]. Menstrual disorders account for approximately 20% of referrals to specialist  
73 gynaecology services[2] and studies have found significant regional variations in use of surgical  
74 treatment within England[3].

75  
76 Women with HMB have significantly worse quality of life than women with normal menstrual  
77 bleeding loss, in terms of their physical and mental health, as well as their emotional, social and  
78 material quality of life[4-7]. More than a third of women with HMB report severe pain[7]. HMB is  
79 also associated with morbidity, including anaemia and related fatigue[8, 9]. Women with HMB  
80 experience reduced participation in social activities and their personal relationships and attendance  
81 at work can be adversely affected[10].

82  
83 In order to improve the quality of life of women with HMB, it is important to understand both the  
84 aetiology of this condition and its management in primary and secondary care[11]. The prevalence  
85 of HMB and conditions which affect symptom severity has been reported to vary by ethnicity[12-15].  
86 In addition, cultural norms and patient choice for treatment may vary between different groups[16,  
87 17].

88  
89 In this study, we used data from the National HMB Audit to examine symptom severity, quality of  
90 life and symptom duration at women's first gynaecology outpatient visit for HMB. The National HMB  
91 Audit was a 4-year project (2010 - 2014) that assessed patient-reported outcomes and experiences  
92 of care for women with HMB in England and Wales. Our objective is to examine symptom severity  
93 and duration at the time of referral to secondary care by age, ethnicity and socio-economic  
94 deprivation to get a better understanding of the burden of disease at the start of treatment in  
95 secondary care.

96

1  
2  
3 97 **METHODS**

4 98 **Data collection**

5  
6 99 Full details of the methods used in the National HMB Audit have been reported elsewhere[1, 4, 18,  
7 100 19]. Women aged between 18 and 60 years in England and Wales who had a new referral for HMB  
8 101 to a gynaecology outpatient department were eligible to participate in the National HMB Audit.  
9 102 Women who had visited a gynaecology outpatient clinic for HMB within the previous 12 months  
10 103 were excluded. Recruitment took place between 1 February 2011 and 31 January 2012[1, 19].  
11  
12  
13

14 104  
15 105 Women who consented to participate completed a baseline questionnaire (58 questions) on age,  
16 106 ethnicity, duration of HMB symptoms, obstetric history, prior treatment received for HMB and co-  
17 107 morbidities. The questionnaire also collected patient-reported HMB-specific and generic quality of  
18 108 life measures.  
19

20 109  
21  
22  
23 110 Scores for symptom severity and condition-specific health-related quality of life were adapted from  
24 111 the Uterine Fibroid Symptom and Quality of Life (UFS-QoL) questionnaire[20]. Of five candidate  
25 112 questionnaires evaluated, only the UFS-QOL could be used throughout the care pathway, measured  
26 113 HRQoL and was psychometrically strong[18]. The UFS-QOL was therefore adapted for HMB and a UK  
27 114 population. We conducted semi-structured interviews with women ( $n = 7$ ) and clinicians ( $n = 5$ ) and  
28 115 a mini focus group ( $n = 3$ ) with local Heavy Menstrual Bleeding Audit coordinators to determine  
29 116 suitable alternative words to describe HMB, and to identify words not clearly understood in UK  
30 117 English. Based on this we changed the wording to refer to 'heavy menstrual bleeding' (i.e. heavy  
31 118 periods) rather than 'fibroids', changed 'checking' to 'ticking'; 'soiling' to 'staining'; 'blue' to 'low';  
32 119 and 'wiped out' to 'exhausted'. The adapted version performed acceptably in a psychometric  
33 120 evaluation. Overall, the symptom severity subscale and the HRQL subscale of the UFS-QOL used as  
34 121 outcomes demonstrated the strongest psychometric properties and have been used to report the  
35 122 audit data. The UFS-QOL consists of eight symptom items and 29 HRQoL items. The symptom items  
36 123 are scored to produce a severity subscale and the HRQoL items are scored into subscales (concern,  
37 124 activities, energy/mood, control, self-consciousness and sexual function). The HRQoL sub-scales can  
38 125 be used separately or combined into an overall HRQoL score. We use the overall HRQoL score in this  
39 126 paper.  
40  
41  
42  
43  
44  
45  
46  
47  
48  
49

50 127  
51 128  
52  
53 129 A generic health-related quality of life measure was derived from the European Quality of Life-5  
54 130 Dimensions (EuroQol-5 or EQ-5D)[21]. This generic measure was used because it is the instrument  
55  
56  
57

1  
2  
3 131 recommended by the Department of Health and allows comparisons with other national studies,  
4 132 such as the Patient Reported Outcome Measures study of common elective surgical procedures[21].  
5  
6 133 Women completed the questionnaire in hospital before their consultation. Using multiple sources of  
7  
8 134 data, the recruitment rate of the audit was estimated to be 31.9%[1]. Descriptive results from the  
9  
10 135 National HMB Audit have been published elsewhere[1, 4, 18, 19].  
11

12 136

13 137 Data from the prospective audit were linked at patient level to records from Hospital Episode  
14 138 Statistics (HES) and Patient Episode Database for Wales (PEDW), administrative databases that  
15 139 capture all inpatient and outpatient episodes in English and Welsh NHS hospitals. Data linkage was  
16 140 performed using deterministic linkage criteria that included NHS number, sex and date of birth.  
17  
18 141

19 142

### 142 **Measures**

20  
21 143 Symptom severity, condition-specific quality of life and generic quality of life scores and the  
22 144 reported duration of symptoms at the first outpatient visit were used as outcomes in this study. The  
23 145 severity and quality of life scores were analysed as continuous variables. Symptom severity scores  
24 146 ranged from 0 (best possible score) to 100 (greatest symptom severity, worst possible score).  
25 147 Condition-specific quality of life ranged from 0 (poorest quality of life) to 100 (best quality of life).  
26 148 Generic quality of life is expressed on a scale with 0 representing death and 1 perfect health[22].  
27 149 Women were asked "How long have you had symptoms of heavy menstrual bleeding", with "2  
28 150 months or less", "more than 2 months but less than 1 year", "more than 1 year" and "don't know" as  
29 151 possible response categories. For analysis, duration of symptoms was grouped as "<1 year", "≥1  
30 152 year" with "don't know" coded as missing. Levels of missing data on HMB symptoms and health-  
31 153 related quality of life were low (2.2% for severity, 4.8% for condition-specific and 9.9% for generic  
32 154 quality of life and 3.0% for symptom duration).  
33  
34  
35  
36  
37  
38  
39  
40  
41

42 155

43 156 Age was categorised as 18-34, 35-39, 40-44, 45-49, ≥50 years for analysis. Women reported their  
44 157 ethnicity as "white", "mixed", "Asian or Asian British", "black or black British", "Chinese" or "other".  
45 158 For analysis, the "mixed", "Chinese" and "other" groups were combined as "other" due to small  
46 159 numbers of women reporting these ethnicities. Self-reported height and weight data were used to  
47 160 derive body mass index (BMI), categorised according to WHO groups as ≤25, 25-30, and ≥30[23].  
48 161 Women reported how many times they had seen their GP for HMB in the year prior to their first  
49 162 outpatient visit, and this was grouped as 0, 1-2, 3-4, >4 for analysis ("don't know" was coded as  
50 163 missing).  
51  
52  
53  
54  
55

56 164

1  
2  
3 165 Women reported their parity, grouped for analysis as “nulliparous” or “parous”. Women were also  
4 166 asked “Have you been told by a doctor that you have any of the following: “heart disease (for  
5 167 example angina, heart attack or heart failure), high blood pressure, lung disease (for example  
6 168 chronic bronchitis or emphysema), diabetes, depression, thyroid disorder, kidney disease, cancer  
7 169 (within the last 5 years). For analysis, the number of co-morbidities reported was grouped as 0, 1,  
8  
9  
10  
11 170  $\geq 2$ .

12 171

13  
14 172 Information on socio-economic deprivation (Index of Multiple Deprivation (IMD)) was extracted  
15 173 from HES and PEDW. IMD is a relative measure of deprivation for small areas across a number of  
16 174 domains, including income, employment, education and housing. We used quintiles of IMD (level 1 =  
17 175 most deprived areas, level 5 = least deprived areas). The methods used to calculate IMD scores in  
18 176 each country in the UK are similar but not directly comparable[24]. For analysis, we generated a  
19 177 combined measure of deprivation for England and Wales by assigning those in each country-specific  
20 178 quintile to the same quintile in a combined measure. This preserved women’s relative deprivation  
21 179 position within each country.

22 180

### 23 181 **Statistical analysis**

24 182 Means and standard deviations (SD) and proportions were used to describe the cohort. Regression  
25 183 analyses were used to examine the relationship between age, ethnicity and socio-economic  
26 184 deprivation and each of the outcomes. For the scores representing symptom severity, condition  
27 185 specific and generic quality of life, multivariable linear regression was used to calculate adjusted  
28 186 differences in mean scores. For duration of symptoms (<1 year and  $\geq 1$  year), multivariable logistic  
29 187 regression was used to calculate adjusted odds ratios (OR). Regression models included BMI, parity  
30 188 and number of co-morbidities as potential confounders. Levels of missing data were low (<3%) for  
31 189 the majority of variables with the exception of ethnicity (7% missing) and BMI (approximately 23%  
32 190 missing, Table 1). Missing values for explanatory variables were imputed using multiple imputation  
33 191 by chained equations[25] and statistical coefficients were obtained using ten imputed datasets and  
34 192 combined using Rubin’s rules[26].

35 193

### 36 194 **ETHICAL APPROVAL**

37 195 The data are from the National Heavy Menstrual Bleeding (HMB) Audit. Based on the Health  
38 196 Research Authority’s guidance, audits are regulated as standard clinical practice outside of the  
39 197 Research Ethics Service[27].

40 198



**RESULTS****Patient Characteristics**

15,325 eligible women completed the questionnaire at their first visit to a gynaecology outpatient department and 15,294 (99.8%) could be linked to HES or PEDW which provided information on socioeconomic deprivation. The women's mean age was 42.3 years (SD 7.6) and BMI 27.3 (SD 5.4) (Table 1). About one in five were nulliparous and one in three reported at least one co-morbidity. 11.7% of women reported a non-white ethnicity, with black or black British (5.4%) and Asian or Asian British (4.3%) being the largest non-white groups. Women in the two least socioeconomically deprived national quintile groups (18.7% in quintile 4 and 15.8% in quintile 5) were under-represented given that per definition 20% of women are expected to be in each group. The distribution of symptom severity, condition-specific and generic quality of life and symptom duration by level of deprivation did not vary significantly between women in England and Wales (data not shown).

**Table 1: Patient characteristics at the first gynaecology outpatient visit for HMB (% and number unless otherwise stated)**

The mean score for symptom severity was 61.8 (standard error (SE) 0.17) with 74.0% of women reporting that they had HMB symptoms for more than one year. The mean score for condition-specific quality of life was 34.7 (SE: 0.18) and for generic quality of life 0.65 (SE: 0.28) (Table 2).

**Severity of symptoms and quality-of-life by socioeconomic deprivation**

Symptom severity scores gradually increased with increasing socioeconomic deprivation (Table 2). Condition-specific and generic quality of life scores also showed a worsening gradient according to deprivation. In other words, women living in more deprived areas reported more severe symptoms (difference -6.1; 95%CI -7.2 to -4.9, between least and most deprived quintile) and a poorer quality of life (difference 6.3; 95%CI 5.1 to 7.5) at their first gynaecology outpatient visit for HMB than those living in less deprived areas.

**Severity of symptoms and quality-of-life by age and ethnicity**

Symptom severity showed a gradual decrease with increasing age, indicating that older women reported less severe symptoms at their first outpatient visit for HMB (difference -5.9; 95% CI: -7.2 to -4.6 between oldest and youngest age groups, Table 2). Quality of life scores based on both the condition-specific and the generic measure increased with increasing age, which shows that older

233 women reported better quality of life at their first HMB outpatient visit (difference 7.3; 95% CI: 5.9  
234 to 8.7) between oldest and youngest age groups). Symptom severity also varied by ethnicity: black  
235 and Asian women reported less severe symptoms than white women (difference compared to white  
236 women -1.9 and -2.4 respectively, Table 2). Condition-specific quality of life did not vary significantly  
237 by ethnicity, whereas compared to white women, Asian woman reported lower generic quality of  
238 life scores (Table 2).

239

#### 240 **Duration of symptoms**

241 Women living in the most deprived areas were slightly less likely to report having had HMB  
242 symptoms for  $\geq 1$  year than those living in the less deprived areas. Women aged between 35 and 49  
243 years were more likely to report having experienced HMB symptoms for  $\geq 1$  year than those younger  
244 than 35. Compared to white women, black women were more likely than white women to report  
245 symptoms for  $\geq 1$  year and Asian women were less likely.

246

#### 247 **Table 2. Severity and duration of symptoms at the first outpatient visit, by age group, ethnicity 248 and socioeconomic deprivation**

249

### 250 **DISCUSSION**

#### 251 **Main Findings**

252 Women living in more socioeconomically deprived areas reported more severe HMB symptoms and  
253 poorer quality of life at their first gynaecology outpatient visit. Older women reported less severe  
254 symptoms and better quality of life than younger women. Reported symptom severity also varied by  
255 ethnicity with black and Asian women reporting less severe symptoms than women from white  
256 ethnic backgrounds.

257

258 Three quarters of the women referred to secondary care reported that they had had symptoms of  
259 HMB for at least one year and women living in the most deprived areas were least likely to report  
260 having had HMB symptoms for  $\geq 1$  year.

261

#### 262 **Interpretation**

263 More severe symptoms and poorer quality of life at first outpatient visit by socioeconomic  
264 deprivation, after adjustment for possible differences in age, ethnicity and body mass index, reflect  
265 that women from more deprived backgrounds report more severe problems at the start of  
266 treatment in secondary care but they were least likely to report that they had symptoms for at least

1  
2  
3 267 one year. The difference in the symptom severity score between women from the least and the  
4 268 most deprived areas of about 6 is likely to be clinically significant, given that a difference of 5 points  
5 269 or more has been specified as clinically important in clinical trials[28]. There is evidence that people  
6 270 from more socioeconomically deprived backgrounds may be more accepting of symptoms, chronic  
7 271 pain or poorer health-related quality of life[29], which is a possible explanation for these finding.  
8  
9 272 Conversely, those from more affluent socioeconomic backgrounds have been found to report  
10 273 greater impact of health conditions on their health and their quality of life, which may be linked to  
11 274 their higher expectations about health and life in general[30].  
12  
13  
14  
15  
16

17 276 Alternative explanations are that differences in symptom severity, quality of life and symptom  
18 277 reflect inequitable access as well as differences in the nature and causes of HMB. Age is often found  
19 278 to be associated with symptom severity<sup>15, 16</sup>[31, 32]. Black women are 2-3 times more likely to have  
20 279 fibroids and endometriosis[32]. Accepting heavy periods as normal vary by ethnicity and other social  
21 280 factors, which in turn can also lead to reluctance to seek care for HMB[16]. Ethnographic research  
22 281 suggests that some women of South Asian ethnicity do not seek healthcare for HMB due to the  
23 282 belief that heavy periods cleanse the body[17]. We adjust for patient-level characteristics that may  
24 283 capture some of these differences but were unable to adjust for other unmeasured potential  
25 284 confounders.  
26  
27  
28  
29  
30

31 285  
32  
33 286 The observation that women living in the most socio-economically deprived areas reported the most  
34 287 severe symptoms but were least likely to report having had symptoms for  $\geq 1$  year may reflect the  
35 288 wording of the question; women were asked "How long have you had symptoms of heavy menstrual  
36 289 bleeding?" and women whose symptom severity had worsened may have reported the duration of  
37 290 the most recent severity, rather than the overall duration.  
38  
39  
40

41 291  
42 292 A key question is whether the observed differences in symptom severity and condition-specific  
43 293 quality of life at the women's first gynaecology outpatient visit are related to differences in women's  
44 294 health seeking behaviour or to differences in how GPs and gynaecologists decide on whether to  
45 295 refer a woman with HMB. A study of self-reported health-care seeking behaviour in England did not  
46 296 find evidence that inequality in access to secondary care according to socioeconomic or ethnic  
47 297 backgrounds is related to patients being less likely to go to their GP or a hospital's emergency  
48 298 department[33]. Similarly, a survey of patients with chronic joint pain found that the proportions of  
49 299 patients who said that they were seeking help from their GP did not differ according to their  
50 300 socioeconomic background[34]. On the other hand, a national study including 130,000 patients from  
51  
52  
53  
54  
55  
56  
57  
58  
59  
60

301 more than 300 primary care practices in England found that older patients and those from more  
302 deprived areas were less likely to be referred to secondary care[35].

303

#### 304 **Implications for policy and practice**

305 In the UK, national guidelines for the management of HMB have been developed by the National  
306 Institute for Health and Care Excellence and the Royal College of Obstetricians and Gynaecologists  
307 (RCOG)[11, 36, 37]. The National HMB Audit carried out a survey of NHS hospitals in England and  
308 Wales to find out how care for women with HMB is organised and delivered at local levels. It found  
309 that key systems such as the availability of local protocols, which specified local arrangements for  
310 patient referral and management in response to the NICE guidelines, were reported only by 30% of  
311 hospitals[38]. Wide variation in the investigations and treatments that were offered to women with  
312 HMB in primary care were also noted. The implementation of locally agreed referral pathways,  
313 recommended by the RCOG, will help to reduce this variation[39].

314

315 Women with HMB in this study reported substantially worse QoL (EQ-5D mean: 0.65, SD: 0.33) than  
316 the population average for women in England (mean: 0.85, SD: 0.003), and compared to women  
317 with incontinence (mean: 0.73, SD: 0.26)[40, 41]. This reinforces the need for interventions to focus  
318 on improving women's quality of life, as recommended by recent NICE guidelines[11]. Obesity can  
319 be associated with HMB so health promotion interventions around diet and exercise could  
320 supplement HMB-specific interventions. Criteria for what constitutes a meaningful improvement in  
321 quality of life are less clear. Awareness raising activities relating to the availability of treatments for  
322 HMB could increase healthcare seeking before symptoms become severe. This may be particularly  
323 beneficial for those from more deprived background who may be more accepting of chronic pain  
324 and worse quality-of-life. In highlighting differences in symptom severity at their first gynaecology  
325 outpatient visit, our findings draw attention to the lack of an agreed threshold for referral of women  
326 with HMB to secondary care in terms of symptom severity and quality of life. Routine measurement  
327 of both symptom severity and quality of life may be required to stimulate greater consistency in  
328 referral thresholds but validated instruments specific to HMB are currently lacking. As there is no  
329 widely used condition-specific measure of condition-specific quality of life for HMB, the National  
330 HMB Audit used the Uterine Fibroid Symptom and Quality of Life (UFS-QOL) questionnaire, adapted  
331 for a UK population of women with HMB[18].

332

1  
2  
3 333 **Strengths and Limitations**

4 334 This study is the first to examine the relationship between sociodemographic factors and patient-  
5  
6 335 reported HMB symptom severity, quality of life and symptom duration in an outpatient setting. It  
7  
8 336 used data collected by a national audit carried out in England and Wales, which produced a relatively  
9  
10 337 large sample. We estimated that the National HMB Audit recruited about 30% of all eligible women.  
11  
12 338 There is no direct way to compare the characteristics of the women who were recruited and those  
13  
14 339 who were not. However, the characteristics of the women who were recruited were broadly  
15  
16 340 representative of the UK population in terms of the distributions of ethnicity and age[42, 43].  
17

18 341  
19 342 Survey questionnaires were only available in the English language, so non-English speakers are likely  
20  
21 343 to be under-represented. On the other hand, case ascertainment varied by provider and women  
22  
23 344 from providers with higher case ascertainment (ascertainment > 45%) were more often from a non-  
24  
25 345 white ethnic background and a more deprived areas than those referred to providers with lower  
26  
27 346 case ascertainment[4] which suggests that the impact of not having questionnaires in other  
28  
29 347 languages is likely to be small.  
30

31 348  
32 349 **CONCLUSION**

33 350 About three in four women at their first visit to a gynaecological outpatient clinic for HMB in England  
34  
35 351 and Wales reported that they had symptoms at least one year before they were referred to  
36  
37 352 secondary care. Women from more deprived areas reported more severe HMB symptoms and a  
38  
39 353 poorer quality of life, which demonstrates a higher burden of disease at the time of referral to  
40  
41 354 secondary care. Primary and secondary care providers should examine to what extent these  
42  
43 355 differences reflect barriers in access to gynaecological secondary care services or women's  
44  
45 356 perceptions of their menstrual problems and health-seeking behaviour.  
46

47 357

48 358

49 359  
50  
51  
52  
53  
54  
55  
56  
57  
58  
59  
60

1  
2  
3 360 **ACKNOWLEDGEMENTS**

4 361 We would firstly like to thank all NHS providers and patients that participated in the National HMB  
5  
6 362 Audit. We would also like to thank Healthcare Quality Improvement Partnership, Health and Social  
7  
8 363 Care Information Centre and the Royal College of Surgeons of England for providing the authors with  
9  
10 364 the data required for this study. This publication is based on data collected by or on behalf of the  
11  
12 365 Healthcare Quality Improvement Partnership, who have no responsibility or liability for the accuracy,  
13  
14 366 currency, reliability and/or correctness of this publication.

15 367  
16 368 **DATA SHARING STATEMENT**

17 369 The data analysed were collected as part of a national clinical audit and linked to administrative  
18  
19 370 hospital data (Hospital Episode Statistics). They were shared with the authors by the Healthcare  
20  
21 371 Quality Improvement Partnership, Health and Social Care Information Centre and the Royal College  
22  
23 372 of Surgeons of England. The data cannot be shared further without formal application to the data  
24  
25 373 providers.

26 374  
27 375 **CONTRIBUTORS**

28 376 The research question was derived by TM and JvdM. Data collection was supported directly by AK,  
29  
30 377 IGU, DC, LBM and through advice by JS, TM, JvdM. Data analysis was performed by AK, IGU & RSG.  
31  
32 378 All authors contributed to the writing of the manuscript.

33 379  
34 380 **COMPETING INTERESTS**

35  
36 381 All authors have completed the ICMJE uniform disclosure form at [www.icmje.org/coi\\_disclosure.pdf](http://www.icmje.org/coi_disclosure.pdf)  
37  
38 382 and declare: all authors except RSG had financial support from the Healthcare Quality Improvement  
39  
40 383 Partnership as part of the National Clinical Audit and Patient Outcomes Programme for the  
41  
42 384 submitted work; no financial relationships with any organisations that might have an interest in the  
43  
44 385 submitted work in the previous three years; no other relationships or activities that could appear to  
45  
46 386 have influenced the submitted work.

47 387  
48 388 **FUNDING**

49 389 The authors declare no funding for the writing of this manuscript. The National Heavy Menstrual  
50  
51 390 Bleeding (HMB) Audit was funded by the Healthcare Quality Improvement Partnership (HQIP) as part  
52  
53 391 of the National Clinical Audit and Patient Outcomes Programme (NCAPOP). The audit was led by the  
54  
55 392 Royal College of Obstetricians and Gynaecologists.

56 393  
57  
58  
59  
60

## 394 REFERENCES

- 395 1. Royal College of Obstetricians and Gynaecologists, London School of Hygiene & Tropical  
396 Medicine, Ipsos MORI, *National Heavy Menstrual Bleeding Audit: Third Annual Report*. 2013,  
397 RCOG Press.
- 398 2. Coulter, A., et al., *Outcomes of referrals to gynaecology outpatient clinics for menstrual*  
399 *problems: an audit of general practice records*. British Journal of Obstetrics and  
400 Gynaecology, 1991. **98**(8): p. 789-796.
- 401 3. Cromwell, D., et al., *Surgery for menorrhagia within English regions: variation in rates of*  
402 *endometrial ablation and hysterectomy*. BJOG, 2009. **116**(10): p. 1373-9.
- 403 4. Royal College of Obstetricians and Gynaecologists, London School of Hygiene & Tropical  
404 Medicine, Ipsos MORI, *National Heavy Menstrual Bleeding Audit: Final Report*. 2014, RCOG  
405 Press.
- 406 5. Karlsson, T.S., L.B. Marions, and M.G. Edlund, *Heavy menstrual bleeding significantly affects*  
407 *quality of life*. Acta Obstet Gynecol Scand., 2014. **93**(1): p. 52-7. doi: 10.1111/aogs.12292.  
408 Epub 2013 Nov 25.
- 409 6. Shankar, M., C. Chi, and R.A. Kadir, *Review of quality of life: menorrhagia in women with or*  
410 *without inherited bleeding disorders*. Haemophilia., 2008. **14**(1): p. 15-20. Epub 2007 Oct 24.
- 411 7. Sule Gokyildiz, E.A., Nezihe Kizilkaya Beji, Meltem Mecdi *The Effects of Menorrhagia on*  
412 *Women's Quality of Life: A Case-Control Study*. ISRN Obstet Gynecol., 2013. **918179**.
- 413 8. Wang, W., et al., *Iron deficiency and fatigue in adolescent females with heavy menstrual*  
414 *bleeding*. Haemophilia, 2013. **19**(2): p. 225-230.
- 415 9. Cohen, B. and Y. Gibor, *Anemia and menstrual blood loss*. Obstetric and Gynecological  
416 Survery, 1980. **35**(10): p. 597-618.
- 417 10. Bitzer, J., M. Serrani, and A. Lahav, *Women's attitudes towards heavy menstrual bleeding,*  
418 *and their impact on quality of life*. Journal of Contraception, 2013. **4**: p. 21-28. .
- 419 11. National Collaborating Centre for Women's and Children's Health, National Institute for  
420 Health and Clinical Excellence (NICE), *Heavy Menstrual Bleeding. Clinical Guideline No. 44.*  
421 2007, NICE.
- 422 12. Harlow, S.D. and B. Campbell, *Ethnic differences in the duration and amount of menstrual*  
423 *bleeding during the postmenarcheal period*. Am J Epidemiol., 1996. **144**(10): p. 980-8.
- 424 13. National Health Service (NHS) UK. *Heavy periods (menorrhagia) - Causes*. 20/02/2015];  
425 Available from: <http://www.nhs.uk/Conditions/Periods-heavy/Pages/Causes.aspx>.
- 426 14. Mayo Clinic. *Menorrhagia (heavy menstrual bleeding)*. 20/02/2015]; Available from:  
427 <http://www.mayoclinic.org/diseases-conditions/menorrhagia/basics/causes/con-20021959>.
- 428 15. Barbara S. Apgar, A.H.K., Uche George-Nwogu, Anne Kittendorf, *Treatment of Menorrhagia*.  
429 2007: American Family Physician. p. 1813-1819.
- 430 16. O'Flynn, N., *Menstrual symptoms: the importance of social factors in women's experiences*.  
431 British Journal of General Practice, 2006. **56**(533): p. 950-957.
- 432 17. Chapple, A., *Iron deficiency anaemia in women of South Asian descent: a qualitative study*.  
433 Ethnicity and Health, 1998. **3**(3): p. 199-212.
- 434 18. Royal College of Obstetricians and Gynaecologists, London School of Hygiene & Tropical  
435 Medicine, Ipsos MORI, *National Heavy Menstrual Bleeding Audit: First Annual Report*. 2011,  
436 RCOG Press.
- 437 19. Royal College of Obstetricians and Gynaecologists, London School of Hygiene & Tropical  
438 Medicine, Ipsos MORI, *National Heavy Menstrual Bleeding Audit: Second Annual Report*.  
439 2012, RCOG Press.
- 440 20. Spies, J., et al., *The UFS-QOL, a New Disease-Specific Symptom and Health-Related Quality of*  
441 *Life Questionnaire for Leiomyomata*. Obstetrics and Gynecology, 2002. **99**(2): p. 290-300.
- 442 21. The EuroQol Group, *EuroQol-a new facility for the measurement of health-related quality of*  
443 *life*. Health Policy, 1990. **16**(3): p. 199-208.



- 1  
2  
3 444 22. Kind, P., G. Hardman, and S. Macran, *UK Population Norms for EQ-5D: York Centre for Health*  
4 445 *Economics Discussion Paper 172*. 1992.
- 5 446 23. World Health Organisation. *BMI Classification*. Global Database on Body Mass Index  
6 447 06/10/2016]; Available from: [http://apps.who.int/bmi/index.jsp?introPage=intro\\_3.html](http://apps.who.int/bmi/index.jsp?introPage=intro_3.html).
- 7 448 24. Payne, R. and G. Abel, *UK indices of multiple deprivation - a way to make comparisons across*  
8 449 *constituent countries easier*. Health Statistics Quarterly, 2012. **53**.
- 9 450 25. Royston P, *Multiple imputation of missing values*. The Stata Journal, 2005 **5**: p. 527-36.
- 10 451 26. Rubin D, *Multiple imputation for non-response in surveys*. 1987, New York: John Wiley &  
11 452 Sons.
- 12 453 27. Health Research Authority, *Defining research*. 2016, Health Research Authority: London.
- 13 454 28. Gibbons, R., et al., *A structured review of patient-reported outcome measures for people*  
14 455 *undergoing elective procedures for benign gynaecological conditions of the uterus. Report to*  
15 456 *the Department of Health*. 2010, University of Oxford: Oxford.
- 16 457 29. Delpierre, C., et al., *Using self-rated health for analysing social inequalities in health: a risk*  
17 458 *for underestimating the gap between socioeconomic groups?* Journal of Epidemiology and  
18 459 Community Health, 2009. **63**: p. 426-432.
- 19 460 30. Ross, C. and M. Van Willigen, *Education and the subjective quality of life*. Journal of Health  
20 461 and Social Behaviour, 1997. **38**: p. 275-297.
- 21 462 31. Janssen, C.A., P.C. Scholten, and A.P. Heintz, *Menorrhagia--a search for epidemiological risk*  
22 463 *markers*. Maturitas., 1997. **28**(1): p. 19-25.
- 23 464 32. National Institute for Health and Care Excellence (NICE), *NICE support for commissioning for*  
24 465 *heavy menstrual bleeding*. 2013.
- 25 466 33. Adamson, J., et al., *Ethnicity, socioeconomic position and gender: do they affect reported*  
26 467 *health-care seeking behaviour*. Social Science and Medicine, 2003. **57**(5): p. 895-904.
- 27 468 34. Thorstensson, C., et al., *Help-seeking behaviour among people living with chronic hip or knee*  
28 469 *pain in the community*. BMC Musculoskeletal Disorders, 2009. **10**(153).
- 29 470 35. McBride, D., et al., *Explaining variation in referral from primary to secondary care: cohort*  
30 471 *study*. BMJ, 2010. **341**: p. c6267.
- 31 472 36. National Institute for Health and Care Excellence (NICE), *Heavy Menstrual Bleeding. NICE*  
32 473 *quality standard 47*. 2013, NICE.
- 33 474 37. Royal College of Obstetricians and Gynaecologists, *Standards for Gynaecology. Report of a*  
34 475 *Working Party*. 2008, RCOG.
- 35 476 38. Cox, S., et al., *The delivery of heavy menstrual bleeding services in England and Wales after*  
36 477 *publication of national guidelines: a survey of hospitals*. BMC Health Services Research,  
37 478 2013. **13**: p. 491.
- 38 479 39. Royal College of Obstetricians and Gynaecologists, *Advice for Heavy Menstrual Bleeding*  
39 480 *(HMB) Services and Commissioners*. 2014.
- 40 481 40. The EuroQol Group, *Self-Reported Population Health: An International Perspective based on*  
41 482 *EQ-5D*, A. Szende, B. Janssen, and J. Cabases, Editors. 2014, Springer Netherlands.
- 42 483 41. Harvie, H.S., et al., *Validity of utility measures for women with urge, stress, and mixed*  
43 484 *urinary incontinence*. Am J Obstet Gynecol., 2014. **210**(1): p. 85.e1-6. doi:  
44 485 10.1016/j.ajog.2013.09.025. Epub 2013 Sep 18.
- 45 486 42. Office for National Statistics, *Office for National Statistics, 2001 Census: Social Focus in Brief -*  
46 487 *Ethnicity 2002*. 2002.
- 47 488 43. Office for National Statistics, *Office for National Statistics, 2011 Census: Ethnicity and*  
48 489 *National Identity in England and Wales 2011*. 2012.
- 49 490  
50 491  
51  
52  
53  
54  
55  
56  
57  
58  
59  
60



492 **Table 1: Patient characteristics at the first gynaecology outpatient visit for HMB**  
 493 **(% and number unless otherwise stated)**

|                                                 | Full Cohort<br>(n=15,325) |
|-------------------------------------------------|---------------------------|
| Age, mean (sd) in years                         | 42.3 (7.6)                |
| Age groups                                      |                           |
| 18-34                                           | 14.9 (2,283)              |
| 35-39                                           | 12.9 (1,971)              |
| 40-44                                           | 26.6 (4,071)              |
| 45-49                                           | 31.3 (4,794)              |
| ≥50                                             | 14.4 (2,206)              |
| Body mass index, mean (sd) in kg/m <sup>2</sup> | 27.3 (5.4)                |
| Body mass index, categories                     |                           |
| ≤25                                             | 39.6 (4,681)              |
| 25-30                                           | 31.7 (3,739)              |
| ≥30                                             | 28.7 (3,392)              |
| Missing                                         | 3,513                     |
| Parity                                          |                           |
| Nulliparous                                     | 17.0 (2,530)              |
| Parous                                          | 83.0 (12,338)             |
| Missing                                         | 457                       |
| Number of reported comorbidities                |                           |
| 0                                               | 66.3 (10,165)             |
| 1                                               | 25.3 (3,878)              |
| ≥2                                              | 8.4 (1,282)               |
| Ethnicity                                       |                           |
| White                                           | 88.3 (12,614)             |
| Asian or Asian British                          | 4.3 (607)                 |
| Black or Black British                          | 5.4 (770)                 |
| Other                                           | 2.0 (292)                 |
| Missing                                         | 1,042                     |
| Socioeconomic deprivation (IMD)                 |                           |
| Quintile 1 (most deprived)                      | 23.5 (3,418)              |
| Quintile 2                                      | 21.7 (3,159)              |
| Quintile 3                                      | 20.2 (2,944)              |
| Quintile 4                                      | 18.7 (2,720)              |
| Quintile 5 (least deprived)                     | 15.8 (2,304)              |
| Missing                                         | 780                       |

494

**Table 2. Severity and duration of symptoms at the first outpatient visit, by age group, ethnicity and socioeconomic deprivation**

|                                    | Severity score<br>(0 best and 100 worst)<br>(n=14,990) |                                                 |         | Condition-specific quality of life<br>(0 worst and 100 best)<br>(n=14,586) |                                                 |         | Generic quality of life<br>(0 death and 1 perfect health)<br>(n=13,802) |                                             |         | Symptoms ≥1 year<br>(n=14,866) |                                         |          |
|------------------------------------|--------------------------------------------------------|-------------------------------------------------|---------|----------------------------------------------------------------------------|-------------------------------------------------|---------|-------------------------------------------------------------------------|---------------------------------------------|---------|--------------------------------|-----------------------------------------|----------|
|                                    | Mean score<br>(se)                                     | Adjusted <sup>i</sup><br>difference<br>(95% CI) | p-value | Mean score<br>(se)                                                         | Adjusted <sup>i</sup><br>difference<br>(95% CI) | p-value | Mean score<br>(se)                                                      | Adjusted <sup>i</sup><br>difference(95% CI) | p-value | % (se)                         | Adjusted <sup>i</sup><br>OR<br>(95% CI) | p-value  |
| 11 Total                           | 61.8 (0.17)                                            |                                                 |         | 34.7 (0.18)                                                                |                                                 |         | 0.65 (0.28)                                                             |                                             |         | 74.0 (0.36)                    |                                         |          |
| 12 Age group                       |                                                        |                                                 |         |                                                                            |                                                 |         |                                                                         |                                             |         |                                |                                         |          |
| 13 18-34                           | 63.1 (0.44)                                            | -                                               |         | 33.2 (0.48)                                                                | -                                               |         | 0.61 (0.007)                                                            | -                                           |         | 70.7 (0.98)                    | -                                       |          |
| 14 35-39                           | 62.9 (0.49)                                            | -1.59 (-2.89, -0.29)                            |         | 33.3 (0.51)                                                                | 1.75 (0.39, 3.10)                               |         | 0.63 (0.008)                                                            | 0.03 (0.01, 0.05)                           |         | 74.8 (1.00)                    | 1.25 (1.09, 1.44)                       |          |
| 15 40-44                           | 62.5 (0.33)                                            | -2.17 (-3.30, -1.04)                            | p<0.001 | 33.7 (0.35)                                                                | 2.59 (1.40, 3.77)                               | p<0.001 | 0.64 (0.005)                                                            | 0.04 (0.02, 0.06)                           | p<0.001 | 76.8 (0.67)                    | 1.39 (1.23, 1.58)                       | p<0.001  |
| 16 45-49                           | 61.3 (0.31)                                            | -3.36 (-4.47, -2.51)                            |         | 35.4 (0.33)                                                                | 4.23 (3.06, 5.39)                               |         | 0.67 (0.005)                                                            | 0.07 (0.05, 0.08)                           |         | 74.2 (0.64)                    | 1.20 (1.06, 1.35)                       |          |
| 17 ≥50                             | 59.0 (0.47)                                            | -5.88 (-7.19, -4.58)                            |         | 38.2 (0.51)                                                                | 7.31 (5.93, 8.68)                               |         | 0.70 (0.007)                                                            | 0.10 (0.07, 0.12)                           |         | 70.9 (0.98)                    | 1.01 (0.88, 1.16)                       |          |
| 18 Ethnicity                       |                                                        |                                                 |         |                                                                            |                                                 |         |                                                                         |                                             |         |                                |                                         |          |
| 19 White                           | 61.9 (0.19)                                            | -                                               |         | 34.8 (0.20)                                                                | -                                               |         | 0.66 (0.003)                                                            | -                                           |         | 74.1 (0.38)                    | -                                       |          |
| 20 Black or Black British          | 61.5 (0.82)                                            | -1.93 (-3.51, -0.35)                            |         | 35.0 (0.86)                                                                | 1.45 (-0.16, 3.06)                              |         | 0.62 (0.01)                                                             | -0.01 (-0.08, 0.02)                         |         | 79.4 (1.47)                    | 1.34 (1.11, 1.62)                       |          |
| 21 Asian or Asian British          | 60.7 (1.02)                                            | -2.38 (-4.25, -0.51)                            | P=0.011 | 34.2 (1.07)                                                                | 1.32 (-0.59, 3.22)                              | 0.1392  | 0.58 (0.02)                                                             | -0.05 (-0.88, -0.01)                        | p<0.001 | 66.1 (1.49)                    | 0.70 (0.58, 0.85)                       | p<0.001  |
| 22 Other                           | 61.5 (1.33)                                            | -0.46 (-3.09, 2.16)                             |         | 33.9 (1.41)                                                                | -1.01 (-3.54, 1.51)                             |         | 0.60 (0.02)                                                             | -0.05 (-0.30, -0.20)                        |         | 72.3 (2.67)                    | 0.92 (0.70, 1.20)                       |          |
| 23 Socioeconomic deprivation (IMD) |                                                        |                                                 |         |                                                                            |                                                 |         |                                                                         |                                             |         |                                |                                         |          |
| 24 Quintile 1 (most deprived)      | 65.5 (0.37)                                            | -                                               |         | 30.5 (0.39)                                                                | -                                               |         | 0.55 (0.007)                                                            | -                                           |         | 72.0 (0.78)                    | -                                       |          |
| 25 Quintile 2                      | 63.5 (0.38)                                            | -1.53 (-2.57, 0.50)                             |         | 33.1 (0.40)                                                                | 1.82 (0.75, 2.90)                               |         | 0.62 (0.006)                                                            | 0.06 (0.05, 0.08)                           |         | 73.6 (0.80)                    | 1.11 (0.99, 1.24)                       |          |
| 26 Quintile 3                      | 61.6 (0.39)                                            | -4.22 (-4.30, -2.12)                            | p<0.001 | 35.0 (0.41)                                                                | 3.44 (2.34, 4.54)                               | p<0.001 | 0.67 (0.006)                                                            | 0.09 (0.08, 0.11)                           | p<0.001 | 75.1 (0.81)                    | 1.20 (1.06, 1.34)                       | P=0.0091 |
| 27 Quintile 4                      | 59.5 (0.41)                                            | -6.02 (-6.02, -3.87)                            |         | 36.8 (0.43)                                                                | 4.78 (3.66, 5.90)                               |         | 0.71 (0.006)                                                            | 0.13 (0.12, 0.15)                           |         | 74.5 (0.85)                    | 1.16 (1.03, 1.31)                       |          |
| 28 Quintile 5 (least deprived)     | 58.2 (0.44)                                            | -6.07 (-7.23, -4.91)                            |         | 38.6 (0.46)                                                                | 6.29 (5.10, 7.48)                               |         | 0.73 (0.006)                                                            | 0.14 (0.13, 0.16)                           |         | 75.1 (0.91)                    | 1.21 (1.07, 1.37)                       |          |

Footnote: All multivariable models were adjusted for body mass index, parity, and number of co-morbidities. P-values based on Wald test

**STROBE 2007 (v4) Statement—Checklist of items that should be included in reports of *cohort studies***

| Section/Topic                | Item # | Recommendation                                                                                                                                                                       | Reported on page # |
|------------------------------|--------|--------------------------------------------------------------------------------------------------------------------------------------------------------------------------------------|--------------------|
| Title and abstract           | 1      | (a) Indicate the study's design with a commonly used term in the title or the abstract                                                                                               | 1                  |
|                              |        | (b) Provide in the abstract an informative and balanced summary of what was done and what was found                                                                                  | 2                  |
| <b>Introduction</b>          |        |                                                                                                                                                                                      |                    |
| Background/rationale         | 2      | Explain the scientific background and rationale for the investigation being reported                                                                                                 | 4                  |
| Objectives                   | 3      | State specific objectives, including any prespecified hypotheses                                                                                                                     | 4                  |
| <b>Methods</b>               |        |                                                                                                                                                                                      |                    |
| Study design                 | 4      | Present key elements of study design early in the paper                                                                                                                              | 5-6                |
| Setting                      | 5      | Describe the setting, locations, and relevant dates, including periods of recruitment, exposure, follow-up, and data collection                                                      | 5                  |
| Participants                 | 6      | (a) Give the eligibility criteria, and the sources and methods of selection of participants. Describe methods of follow-up                                                           | 5                  |
|                              |        | (b) For matched studies, give matching criteria and number of exposed and unexposed                                                                                                  | N/A                |
| Variables                    | 7      | Clearly define all outcomes, exposures, predictors, potential confounders, and effect modifiers. Give diagnostic criteria, if applicable                                             | 5-6                |
| Data sources/<br>measurement | 8*     | For each variable of interest, give sources of data and details of methods of assessment (measurement). Describe comparability of assessment methods if there is more than one group | 5-6                |
| Bias                         | 9      | Describe any efforts to address potential sources of bias                                                                                                                            |                    |
| Study size                   | 10     | Explain how the study size was arrived at                                                                                                                                            | 5, 7               |
| Quantitative variables       | 11     | Explain how quantitative variables were handled in the analyses. If applicable, describe which groupings were chosen and why                                                         | 5-6                |
| Statistical methods          | 12     | (a) Describe all statistical methods, including those used to control for confounding                                                                                                | 6-7                |
|                              |        | (b) Describe any methods used to examine subgroups and interactions                                                                                                                  | 6                  |
|                              |        | (c) Explain how missing data were addressed                                                                                                                                          | 7                  |
|                              |        | (d) If applicable, explain how loss to follow-up was addressed                                                                                                                       | N/A                |
|                              |        | (e) Describe any sensitivity analyses                                                                                                                                                | N/A                |
| <b>Results</b>               |        |                                                                                                                                                                                      |                    |

|                          |     |                                                                                                                                                                                                              |                        |
|--------------------------|-----|--------------------------------------------------------------------------------------------------------------------------------------------------------------------------------------------------------------|------------------------|
| Participants             | 13* | (a) Report numbers of individuals at each stage of study—eg numbers potentially eligible, examined for eligibility, confirmed eligible, included in the study, completing follow-up, and analysed            | 7                      |
|                          |     | (b) Give reasons for non-participation at each stage                                                                                                                                                         | Only one stage         |
|                          |     | (c) Consider use of a flow diagram                                                                                                                                                                           | Only one stage         |
| Descriptive data         | 14* | (a) Give characteristics of study participants (eg demographic, clinical, social) and information on exposures and potential confounders                                                                     | 7-8 and Table 1        |
|                          |     | (b) Indicate number of participants with missing data for each variable of interest                                                                                                                          | 8 (Table 1)            |
|                          |     | (c) Summarise follow-up time (eg, average and total amount)                                                                                                                                                  | N/A (Baseline)         |
| Outcome data             | 15* | Report numbers of outcome events or summary measures over time                                                                                                                                               | N/A (Baseline results) |
| Main results             | 16  | (a) Give unadjusted estimates and, if applicable, confounder-adjusted estimates and their precision (eg, 95% confidence interval). Make clear which confounders were adjusted for and why they were included | 8-9 (Table 2)          |
|                          |     | (b) Report category boundaries when continuous variables were categorized                                                                                                                                    | 8 (Table 2)            |
|                          |     | (c) If relevant, consider translating estimates of relative risk into absolute risk for a meaningful time period                                                                                             |                        |
| Other analyses           | 17  | Report other analyses done—eg analyses of subgroups and interactions, and sensitivity analyses                                                                                                               | N/A                    |
| <b>Discussion</b>        |     |                                                                                                                                                                                                              |                        |
| Key results              | 18  | Summarise key results with reference to study objectives                                                                                                                                                     | 9                      |
| <b>Limitations</b>       |     |                                                                                                                                                                                                              |                        |
| Interpretation           | 20  | Give a cautious overall interpretation of results considering objectives, limitations, multiplicity of analyses, results from similar studies, and other relevant evidence                                   | 9-10                   |
| Generalisability         | 21  | Discuss the generalisability (external validity) of the study results                                                                                                                                        | 11                     |
| <b>Other information</b> |     |                                                                                                                                                                                                              |                        |
| Funding                  | 22  | Give the source of funding and the role of the funders for the present study and, if applicable, for the original study on which the present article is based                                                | 7                      |

\*Give information separately for cases and controls in case-control studies and, if applicable, for exposed and unexposed groups in cohort and cross-sectional studies.

**Note:** An Explanation and Elaboration article discusses each checklist item and gives methodological background and published examples of transparent reporting. The STROBE checklist is best used in conjunction with this article (freely available on the Web sites of PLoS Medicine at <http://www.plosmedicine.org/>, Annals of Internal Medicine at <http://www.annals.org/>, and Epidemiology at <http://www.epidem.com/>). Information on the STROBE Initiative is available at [www.strobe-statement.org](http://www.strobe-statement.org).
